1           On the estimation of beat-to-beat time domain heart rate  
2           variability indices from smoothed heart rate time series

3   Miguel A. Garcia-Gonzalez<sup>1¶\*</sup>, Mahtab Mohammadpoor-Faskhodi<sup>1&</sup>, Mireya Fernandez-Chimeno<sup>1&</sup>, and  
4   Juan J. Ramos-Castro<sup>1&</sup>

5

6   <sup>1</sup> Department of Electronic Engineering, Universitat Politècnica de Catalunya, Campus Nord, Edifici C-4,  
7   08034, Barcelona, Spain

8   \*Corresponding author

9   e-mail: [miquel.angel.garcia@upc.edu](mailto:miquel.angel.garcia@upc.edu)

10   <sup>¶</sup>This author is the main contributor to the work

11   <sup>&</sup>These authors contributed equally to this work

## 12 **Abstract**

13

14 This study tests the feasibility of estimating some time-domain heart rate variability indices (the  
15 standard deviation of the RR time series, SDNN, and the standard deviation of the differentiated  
16 RR time series, or RMSSD) from smoothed and rounded to the nearest beat per minute heart  
17 period time series using shallow neural networks. These time series are often stored in wearable  
18 devices instead of the beat-to-beat RR time series. Because the algorithm for obtaining the  
19 recorded mean heart rate in wearable devices is often not disclosed, this study test different  
20 hypothetic sampling strategies and smoothers. Sixteen features extracted from 5 minute smoothed  
21 heart period time series were employed to train, validate, and test shallow neural networks in  
22 order to provide estimates of the SDNN and RMSSD indices from freely available public  
23 databases RR time series. The results show that, using the proposed features, the median relative  
24 error (averaged for each database) in the SDNN ranges from 2% to 14% depending on the  
25 smoothness, sampling strategy, and database. The RMSSD is harder to estimate, and its median  
26 relative error ranges from 6% to 32%. The proposed methodology can be easily extended to other  
27 averaged heart rate time series, HRV indices and supervised learning algorithms

## 28 **Introduction**

29

30 Heart rate variability (HRV) helps to assess the status of the autonomic nervous system (ANS)  
31 [1] and has been used for the last decades as a tool to quantify risk in a wide variety of both  
32 cardiac and non-cardiac disorders [2]. HRV reflects physiological variation in the duration of  
33 intervals between consecutive beats originating from the sinus node [1]. Over the years, several  
34 indices for characterizing the dynamic physiological variation of beat-to-beat heart periods have  
35 been proposed and used in different scenarios. Some of these indices have become measurement  
36 standards [3]. HRV indices can be classified as time-domain, spectral-domain, or non-linear  
37 dynamic indices, and their use depends on the target physiological system, condition, or stressor  
38 of interest.

39 The definition of each HRV index is based on the characterization of a time series of consecutive  
40 heartbeat periods. This time series is known as the RR time series (when the period between  
41 heartbeats is assessed by using an electrocardiogram (ECG) and a proper QRS detector) or as the  
42 inter-beat interval (IBI) time series (when assessed by other physiological signals that are  
43 triggered by heart contraction such as finger or wrist photoplethysmography (PPG)). Whatever  
44 the IBI or the RR time series is employed, the importance of an accurate estimation of each sample  
45 of the series has been stressed elsewhere [3], [4]. Accordingly, accurate HRV index determination  
46 is often obtained in controlled environments while restraining movements and/or using  
47 uncomfortable instrumentation to avoid heartbeat misdetections.

48 In recent years, with the development of technology, smart wearable devices have been  
49 developed rapidly in various fields such as health care and health monitoring [5]. In the health  
50 care field, wearable devices as portable electronic medical devices are used to perceive, record,  
51 analyze, regulate, and intervene in physiological process to maintain health. Moreover, they can  
52 be utilized to treat diseases with the support of various technologies for identification, sensing,  
53 connecting, and storing in physical servers or in the cloud a large amount of information that is  
54 relevant of the subject treatment. Therefore, wearables can be used as ambulatory systems  
55 providing detailed and individual information about health status. Heart rate (HR) is one of the  
56 most often measured parameters while monitoring vital signs, especially in most mobile health  
57 (m-Health) applications employing wearable devices [6]. HR assessment represents a routine  
58 part of any complete medical examination due to the heart's essential role in an individual's  
59 health. Therefore, HR measurement is becoming a part of the regular people lifestyle assessment.  
60 Many electronic devices such as smartwatches, exercise equipment, and smartphones are  
61 becoming able to measure this parameter accurately. Although measuring HR in wearables is not  
62 as accurate as the classical ECG methods, it has become a very popular tool for consumers. Some  
63 recent wrist-worn wearables, such as the Apple Watch Series 4 to 8, and Samsung Galaxy Watch  
64 4 are monitoring HR with ECG single-lead electrodes, and are approved as medical devices in  
65 some countries. However, this technology is still limited as users have to sit with their watch

66 wearing a wristband resting on a flat surface and by putting a finger from the hand opposite to the  
67 watch for 30 s to close the circuit. In recent years, the demand for using PPG sensors to monitor  
68 HR has increased due to its simple function, high flexibility, and portability [7]. Despite PPG-  
69 based methods are more user-friendly and convenient, ECG-based methods are more precise. One  
70 of the most challenging problems with wearables is that they are vulnerable to motion artifacts.  
71 In recent years, signal processing techniques such as machine learning approaches, have been  
72 successful to reduce the impact of motion artifacts and estimate HR properly [8], [9]. HR  
73 estimation from artifact-induced signals has been studied using different techniques such as Fast  
74 Fourier Transform (FFT), Adaptive Filtering, Independent Component Analysis (ICA),  
75 frequency-domain ICA, Empirical Mode Decomposition (EMD), wavelet denoising methods,  
76 spectral subtraction, and Kalman Filtering[10]. After applying these techniques, most wearables  
77 provide estimates of heart rate (but no direct assessment of beat-to-beat changes in heart rate) that  
78 update at intervals that depend on the design of the device. Each of the reported values of heart  
79 rate is the output of an (often not-disclosed) algorithm that summarizes, probably by smoothing,  
80 the RR/IBI time series for a certain number of consecutive beats. This generally unknown  
81 algorithm acts as a filter that reduces the impact of misdetections while providing meaningful  
82 heart rate values.

83 Owing to the ubiquity of wearables and their inability to directly estimate the RR or IBI time  
84 series, it is interesting to check whether some of the short-term HRV indices obtained from the  
85 RR or IBI time series can be estimated from the smoothed HR time series provided by wearables.  
86 This work starts with the estimation of two of the most commonly employed short-term HRV  
87 indices: the standard deviation of the RR/IBI time series (known as the SDNN) and the standard  
88 deviation of the differentiated RR/IBI time series (generally referred to as the RMSSD). Both  
89 indices were among the recommended short-term time-domain HRV indices. While SDNN  
90 reflects all the cyclic components responsible for variability during the recording period, RMSSD  
91 estimates high-frequency variations in the heart rate [3]. Because SDNN and RMSSD are directly  
92 computed from the time series of intervals between consecutive heartbeats, the prediction of both

93 indices employs the reciprocal of the smoothed HR time series, which we refer to as the smoothed  
94 heart period time series (sHP).

95 Hence, the aim of this study is to test the feasibility of estimating the classical HRV short-term  
96 SDNN and RMSSD indices from the sHP time series, where each point of the sHP is obtained by  
97 smoothing the RR or IBI intervals during a certain interval. The presented methodology can be  
98 easily adapted to any sHP measuring system provided that the algorithm to compute the sHP from  
99 the IBI or RR time series is known. Moreover, the methodology can be easily expanded to other  
100 HRV indices such as spectral indices.

101

## 102 **Materials and methods**

103

104 In this work, we attempt to estimate the SDNN and RMSSD indices that quantify the original  
105 RR/IBI intervals from the sHP time series. The estimation of SDNN and RMSSD uses the features  
106 of the corresponding sHP time series feeding an artificial neural network (ANN), whose  
107 characteristics depend on the smoothing algorithm applied to the original RR/IBI intervals. The  
108 recording duration for each time series was approximately 5 min. Fig 1 shows the methodology  
109 that we followed and described in this section.

110

### 111 **Fig 1. General structure of the proposed methodology.**

112

113 First, most wearables that measure HR internally measure the heart period (HP) by smoothing  
114 the inter-beat intervals of the subject under measurement using an internal algorithm. As shown  
115 in Fig 1, during an observational time (5 min in this work), a total of N inter-beat intervals were  
116 detected and processed, and an sHP time series with M samples (very often  $M < N$ ) was obtained.  
117 Because the processing procedure is not generally disclosed in commercial devices, this work  
118 presents the results for some tentative smoothing algorithms. Most devices record the evolution

119 of the sHP over time. These time series are characterized in this work using simple statistical  
120 indices to obtain a total of k features for each sHP time series during the observational time. These  
121 features are fed to an ANN with k inputs and one output that provides an estimation for either the  
122 SDNN or RMSSD of the original RR/IBI time series. The ANN depends on the smoothing  
123 algorithm, selected features, and intended index to be estimated.

124 To test the accuracy of the SDNN and RMSSD estimates that can be obtained from actual  
125 recordings, we used the following methodology:

126 1.- A large number of RR time series with durations longer than 5 min were obtained from  
127 available free ECG databases or annotations. These databases and the RR time-series procurement  
128 are described in Section 2.1.

129 2.- The selected time series was split into non-overlapping sections with durations between 4.5  
130 and 5 minutes. Avoiding overlap among split sections guarantees that the training, test, and  
131 validation sets for ANN fitting contain information corresponding to different feature realizations.  
132 Almost each employed RR time series section had a duration very close to 5 min; however, if the  
133 last non-overlapping section associated with the recording of a subject lasted more than 4.5  
134 minutes, it was also included in the analysis. For each section, the sHP time series is computed  
135 using the proposed smoothing algorithm. The splitting and smoothing algorithm proposals are  
136 presented in Section 2.2.

137 3.- A total of 16 features have been employed to characterize each sHP time series. The features  
138 are described in section 2.3

139 4. For each smoothing algorithm and target index (SDNN or RMSSD), an ANN was trained and  
140 tested. The structure of the ANN, learning procedure, and validation and testing stages are  
141 presented in section 2.4 as well as the statistics employed to quantify the differences between the  
142 estimated indices and the indices obtained from the original RR/IBI time series.

## 143 **Databases description and RR time series procurement**

144 Three databases available at the Physionet site [11] were used in this study. All three databases  
145 contained at least one channel of raw ECG on healthy volunteers, measured for at least 8 min.

146 The Autonomic Aging database [12] contains at least one channel of ECG measured at rest  
147 during an average of 19 min (ranging from 8 min to 45 min) of 1121 healthy volunteers with ages  
148 ranging from 18 to 92 years. The ECG signal was sampled at 1 kHz. Some of the database  
149 recordings had two ECG channels. For detection, the first ECG channel (ECG1) was employed;  
150 however, the second channel was used when the quality of ECG1 was qualified as very poor by  
151 visual inspection and the second channel offered a significantly better quality. For all volunteers,  
152 the RR time series was obtained using the QRS detector included in the Kubios HRV Premium  
153 (3.5.0), which interpolates the input signal to obtain an equivalent sampling frequency of 2 kHz  
154 [13]. After QRS detection, an automatic artifact correction utility embedded in the same software  
155 [14] was employed to obtain the final RR time series. Noise segments detected by software using  
156 a medium automatic detector were visually inspected. If the signal was considered noisy because  
157 of the presence of short-duration arrhythmia, the segment was corrected using an automatic  
158 artifact correction algorithm. In case of noise caused by very poor ECG quality, manual correction  
159 of the beats was attempted. Only recordings with considerably poor quality or persistent  
160 arrhythmia were excluded from the analysis. These rejected recordings correspond to subjects  
161 0167, 0186, 0244, 0299, 0300, 0304, 0321, 0332, 0365, 0373, 0400, 0428, 0554, 0581, 0604,  
162 0634, 0649, 0653, 0686, 0753, 0767, 0895, 0935 and 1011. Some short segments of the detected  
163 RR time series were deemed as noise by the Kubios software and were assigned a Not a Number  
164 value in the corresponding output file. These segments were cropped prior to analysis. Finally,  
165 1097 RR time series were included in the study.

166 The Fantasia Database [15] contains ECG recordings of 40 healthy subjects measured while  
167 watching Disney's Fantasia movie. The ECG signal was sampled at 250 Hz. The ages of the  
168 subjects ranged from 21 to 85 years. RR time series detection follows the same methodology as  
169 in the Autonomic Aging database; therefore, the signal is interpolated to have an equivalent  
170 sampling frequency of 2 kHz. Recording f2o08 was rejected because of the persistence of

171 arrhythmia, while recording f2y10 was rejected because the signal was lost during some long  
172 segments of the recording. In total, 38 RR time series were included in this study.

173 The Normal Sinus Rhythm RR Interval Database [11] contains beat annotation files for 54 long-  
174 term ambulatory ECG recordings of subjects with normal sinus rhythm while performing their  
175 normal activities. The original ECG recordings from which annotations were obtained had a  
176 sampling frequency of 128 Hz. Hence, the RR time series of this database has a lower time  
177 resolution than that of the other databases. The ages of the subjects ranged from 28 to 76 years.  
178 After reading the annotations with software available on the PhysioNet web (using the “rdann”  
179 function and Matlab© [16]), the raw RR time series were obtained by differentiating the location  
180 of the annotations. Then, the corrected RR time series was obtained using the Kubios HRV  
181 Premium (3.5.0) software using the automatic correction algorithm. The automatic noise detection  
182 was set to a medium level, and zones that were classified as noise were cropped and not considered  
183 for analysis. The nsr024 recording was rejected for the analysis because it showed too many  
184 ectopic beats. Accordingly, 53 RR time series were included in this study.

185 The RR time series of the three databases and their corresponding time vectors from the  
186 beginning of each recording are available [in this public repository](#).

187

## 188 **Smoothed Heart Period time series definitions**

189 Each recording in the repository consisted of two vectors: a vector  $t$  containing timestamps and  
190 their corresponding **RR** intervals. Each timestamp was obtained as the arithmetic mean of two  
191 consecutive QRS locations, and the corresponding RR interval was obtained as the difference  
192 between them. A general smoothing algorithm looks for the samples in the **RR** time series that  
193 start at timestamp  $t_{min}$  and end at timestamp  $t_{max}$  and computes a number reflecting the central  
194 tendency of the selected RR samples. Updating the values of  $t_{min}$  and  $t_{max}$  produces different



195 central-tendency numbers. Therefore, a smoothed heart period time series (*sHP*) was obtained by  
196 changing the values of the start and finish times.

197 Here, for each RR time series in the repository, the *sHP* time series is generated using an  
198 iterative procedure with initial values of  $t_{min}(0) = 0$  s and  $t_{max}(0) = T$  and these values are updated  
199 for each iteration as  $t_{min}(i+1) = t_{min}(i) + \Delta t$  and  $t_{max}(i+1) = t_{max}(i) + \Delta t$ . In each iteration, the central  
200 tendency of the samples in the *RR* time series with associated timestamps between  $t_{min}$  and  $t_{max}$  is  
201 computed, and the corresponding measurement timestamp is determined as  $t_{sHP}(i) = (t_{min}(i) +$   
202  $t_{max}(i))/2$ . In this study, to assess the influence of the smoothing procedure, two combinations of  
203  $T$  and  $\Delta t$  (that will referred to as the sampling strategies) were employed:

204 SS1 or sampling strategy #1:  $T = 10$  s,  $\Delta t = 1$  s

205 SS2 or sampling strategy #2:  $T = 30$  s,  $\Delta t = 5$  s

206 We also employed four central tendency measures to characterize the selected RR time intervals  
207 to define the *sHP* time series:

208 CTM1 or central tendency measure #1: The arithmetic mean of the RR time intervals starting at  
209  $t_{min}$  and ending at  $t_{max}$

210 CTM2 or central tendency measure #2: The median of the RR time intervals starting at  $t_{min}$  and  
211 ending at  $t_{max}$ . This is a robust measure against outliers in the RR time series.

212 CTM3 or central tendency measure #3: This central tendency mimics when employing averaged  
213 heart rate time series from commercial devices that are normally quantified as integers in beats  
214 per minute (bpm). If the RR time series is in milliseconds,

215 
$$CTM3 = \frac{60000}{\lceil \frac{60000}{CTM1} \rceil} \quad (1)$$

216 CTM4 or central tendency measure #4: As in the case of CTM3, but using the median instead of  
217 the arithmetic mean to perform the rounding:

218 
$$CTM4 = \frac{60000}{\lceil \frac{60000}{CTM2} \rceil} \quad (2)$$

219 Fig 2 shows an example of how the *sHP* time series was obtained using SS1 and CTM1. Note  
220 that, although the *RR* time series is an unevenly sampled time series, the *sHP* time series is evenly  
221 sampled when using the proposed sampling strategies.

222

223 **Fig 2. Example of computation of *sHP* using the sampling strategy #1 (window length  $T=10$**   
224 **s and sliding step  $\Delta t=1$  s) and central tendency measure #1 (arithmetic mean) for the subject**  
225 **1107 of the Autonomic Aging database.** The upper panel shows the details of the computation  
226 of the central tendency in a short segment of the recording. The red asterisks show the *RR* time  
227 intervals used for the computation of the *sHP* for the window starting at 450 s and ending at 460s  
228 while the blue circles show the *RR* time intervals used for the next iteration (starting at 451 s and  
229 ending at 461 s). The dashed and dotted lines show the time intervals for smoothing and the  
230 corresponding arithmetic means. The red and blue crosses reflect the two arithmetic means  
231 located at the center value of the measurement interval (455 s for the first interval, 456 s for the  
232 next interval). The lower panel shows the *RR* time series (blue) and the corresponding *sHP* (red)  
233 after iteratively applying the sampling strategy #1 and computing the central tendency measure  
234 #1 through the whole recording.

235

## 236 **Target computation, *sHP* segmentation and feature extraction**

237 SDNN and RMSSD should be computed for approximately the same recording length. In the  
238 short-term HRV analysis, this was approximately 5 min. Nevertheless, the *RR* time series in the  
239 repository ranged from 8 min to more than 24 h. Hence, it is necessary to partition the *RR* time  
240 series obtaining an approximately 5 minutes long time series and compute the short-term HRV  
241 time indices from them. SDNN and RMSSD were the target indices in this study. In parallel, the  
242 segments of the *sHP* time series that originate from the partitioned *RR* time series must be

243 identified. Selected features from these **sHP** segments will feed the designed machine-learning  
244 algorithms to estimate the corresponding target HRV time indices. This procedure was performed  
245 as follows.

- 246 1. Initially, an observational window is located between  $t_{start}=0$  s and  $t_{end}=300$  s.
- 247 2. The samples of the **RR** time series that have corresponding  $t$  timestamps inside the  
248 interval  $[t_{start}, t_{end}]$  are used to compute SDNN and RMSSD, as explained in [3].
- 249 3. An **sHP<sub>s</sub>** time series is cropped from the **sHP** time series by identifying the samples that  
250 satisfy their corresponding  $t_{sHP}$  timestamps and are included inside the interval  $[t_{start}, t_{end}]$ .
- 251 4. The selected features that will be described next are extracted from the **sHP<sub>s</sub>**. Hence, for  
252 each SDNN or RMSSD index, a set of features characterizing the **sHP<sub>s</sub>** is available.
- 253 5. The observation window was displaced by 300 s. If  $i$  represents the number of iterations,  
254  $t_{start}(i+1)=t_{start}(i)+300$  s and  $t_{end}(i+1)=t_{end}(i)+300$  s
- 255 6. While  $t_{end}(i+1)$  is lower than the total recording time (maximum of the  $t$  time series), Steps  
256 2, 3, 4, and 5 are repeated.
- 257 7. If  $t_{start}(i+1)$  is lower than the total recording time, then  $t_{end}(i+1)$  is not  
258 a. If  $t_{end}(i+1)-t_{start}(i+1)\geq 270$  s, repeat one last time the steps 2,3,4 and 5, and the procedure  
259 stops.
- 260 b. If  $t_{end}(i+1)-t_{start}(i+1)<270$  s, the procedure stops.

261 Fig 3 shows an example of the procedure using the same recording as the lower panel of Fig 2.  
262 In the second iteration, time series with timestamps between 300 and 600 s were selected. The  
263 section of the **RR** time series is employed to compute the SDNN and RMSSD, whereas the section  
264 of the **sHP** time series is employed for feature extraction.

265

266 **Fig 3. Example of RR index target computation and *sHP* segmentation for the subject 1107**  
267 **of the Autonomic Aging database.** The upper panel shows the observational window for the  
268 second iteration ( $i=2$ ) starting at 300 s and ending at 600 s as well as the ***RR*** and ***sHP*** time series.  
269 The left lower panel shows the section of the RR time series that correspond to the observational  
270 window as well as the values of the target indices (SDNN and RMSSD). The right lower panel  
271 shows the section of the ***sHP*** that will be further quantified using some selected features.

272

273 Prior to feature extraction, three auxiliary time series are derived from the ***sHP<sub>s</sub>***:

274 a. The differentiation of the ***sHP<sub>s</sub>***, defined as:

$$275 \quad dsDP_s(i) = sHP_s(i + 1) - sHP_s(i) \quad \forall i \in [1, N - 1] \quad (3)$$

276 b. The second order differentiation of the ***sHP<sub>s</sub>***, defined as:

$$277 \quad ddsDP_s(i) = dsHP_s(i + 1) - dsHP_s(i) \quad \forall i \in [1, N - 2] \quad (4)$$

278 c. The third order differentiation of the ***sHP<sub>s</sub>***, defined as:

$$279 \quad dddsDP_s(i) = ddsHP_s(i + 1) - ddsHP_s(i) \quad \forall i \in [1, N - 3] \quad (5)$$

280 d. The cumulated sum of the ***sHP<sub>s</sub>***, after mean removal defined as

$$281 \quad csHP_s(i) = \sum_{j=1}^i \left( sHP_s(j) - \frac{1}{N} \cdot \sum_{k=1}^N sHP_s(k) \right) \quad (6)$$

282 where  $N$  is the number of samples in ***sHP<sub>s</sub>***. In this study, we obtained 16 features corresponding  
283 to the mean value of the ***sHP<sub>s</sub>*** and the sample standard deviation, skewness, and kurtosis of ***sHP<sub>s</sub>***,  
284 ***dsHP<sub>s</sub>***, ***ddsHP<sub>s</sub>***, ***dddsHP<sub>s</sub>***, and ***csHP<sub>s</sub>***. Fig 4 shows an example of Figs 2 and 3 showing four of the  
285 time series (***dddsHP<sub>s</sub>*** is not shown for the sake of simplicity) and the corresponding values of the  
286 features.

287

288 **FIG 4. Example of feature extraction for the second segmentation of the *sHP* time series of**  
289 **the subject 1107 of the Autonomic Aging database.** The panels show different time series and  
290 their corresponding features.

291

292 In summary, each *RR* time series and *sHP* time series were segmented in sections with a duration  
293 of approximately 5 min ( at least 270 s). Each segment of the *RR* time series was used to compute  
294 the corresponding SDNN and RMSSD indices. These values will be employed later to train and test  
295 a machine learning algorithm. By contrast, each segment of the *sHP* defines four auxiliary time  
296 series, and three features are obtained from each time series (including the original *sHP* segment).  
297 These features and the mean value of the *sHP* will be the inputs of the machine-learning algorithm,  
298 as shown in Fig 1. The functions developed for MATLAB © that use an arbitrary input *RR* time  
299 series and their corresponding timestamp time series, generate the *sHP* using one of the described  
300 sampling strategies and one of the proposed central tendency measures, perform the segmentation,  
301 and compute the target indices, which are also available in the public repository. MATLAB files  
302 containing the target values and different 16 features for all recordings using the two sampling  
303 strategies and four central tendency measures are also available at the repository.

304

## 305 **ANN fitting and testing**

306 In this study, shallow ANNs [17] (with only one hidden neuron layer) were employed to provide  
307 estimates of SDNN and RMSSD from the 16 features previously described. The ANNs were  
308 trained using the Bayesian regularization backpropagation method [18] to obtain estimates that  
309 generalize well. We used shallow instead of deep ANNs to simplify the tailoring of the  
310 architecture of the ANNs because the number of hidden neurons is not known a priori.  
311 Consequently, several sizes of the hidden neuron layer were tested to choose the size that provides  
312 a low error in the estimation while still providing a general solution to the problem. The Deep

313 Learning Toolbox of Matlab<sup>®</sup> was employed to define, train, validate, test, and evaluate the  
314 generalization using the estimation errors of the ANNs.

315 The size of the hidden neuron layer is a parameter that must be fixed before the start of  
316 supervised learning. Because this size may impact overfitting of the model[19], we tested the  
317 performance of models with different hidden neuron layer sizes using a subset of subjects,  
318 features, and targets from the pool of recordings of the previously described databases. Hence,  
319 before starting the learning procedure for any of the ANNs, the features and targets corresponding  
320 to approximately half of the subjects in each database were kept for further performance testing.  
321 This set of information is referred to as the *keeping* set, while the set employed for the learning  
322 of the ANN is referred to as the *learning* set. The MATLAB<sup>®</sup> code and the permutation for  
323 assigning the subjects to the keeping or learning sets are available [at the repository](#). The same  
324 permutation was employed for all the sampling strategies, smoothing algorithms, and target  
325 indices (either SDNN or RMSSD); therefore, every ANN in this work learned using the same  
326 information. Finally, the learning set batch size was 9317 (obtained from 9317 sections of *sHP*  
327 time series of durations around 5 min) while the batch size was 9798. The batch size was different  
328 for the two sets because the lengths of the recordings were different among the subjects.

329 For the optimization of the hidden neuron layer size, for every sampling strategy and central  
330 tendency measure, we tested hidden neuron layer sizes ranging from 1 to 20. Each model learned  
331 using a training set that contained all the batches (features and targets) of approximately 50% of  
332 the subjects for each database of the learning set, a validation set that contained batches of  
333 approximately 25% of the learning set, and a testing set with the remnants of the learning set. A  
334 random permutation allocated each subject of the learning set to the training, validation, or testing  
335 sets every time a new model for the ANN was fitted. The learning algorithm used the mean  
336 squared error (MSE) between the target and ANN output to fit the model. The hidden neurons  
337 made a weighted sum at their inputs and obtained their output using the hyperbolic tangent  
338 sigmoid transfer function to accelerate convergence[20]. The code for training, testing, and  
339 validating the ANNs using the training set is available [in the repository](#).

340 Errors in the estimation may not be normally distributed (in fact, visual inspection of targets  
341 and estimations in some cases show that they correspond to heavy-tailed distributions). Therefore,  
342 for the choice of the hidden neuron layer size, the interquartile range of the errors after fitting the  
343 model was employed as a figure of merit. The interquartile range when applying the model to the  
344 learning set ( $IQR_{\text{learning}}$ ) will be considered as a quantifier of the goodness of fit, and when  
345 applying the model to the keeping set ( $IQR_{\text{keeping}}$ ) will be considered as a quantifier of the  
346 generalizability of the model. Moreover, the interquartile range of the errors when applying the  
347 model to the pooling of both sets ( $IQR_{\text{all subjects}}$ ) will be considered to optimize the hidden neuron  
348 layer size.

349 For each hidden neuron layer size, we repeated the fitting of the model a number of times equal  
350 to the rounding of 300 divided by the hidden neuron layer size, and the  $IQR_{\text{learning}}$ ,  $IQR_{\text{keeping}}$  and  
351  $IQR_{\text{all subjects}}$  for the realizations, and kept the model with the lowest  $IQR_{\text{all subjects}}$ . We determined  
352 the final size of the hidden neuron layer by inspecting the evolution of the  $IQR_{\text{all subjects}}$  with  
353 increasing sizes.

354 After selecting the hidden neuron layer size, the ANN with the best performance (measured  
355 once again by  $IQR_{\text{all subjects}}$ ) after 100 completely new fittings was selected as the best ANN for  
356 the estimation of the target indices. In total, 16 ANN were obtained (also available [at the](#)  
357 [repository](#) and specified as the Deep Learning Toolbox of Matlab® net variables) corresponding  
358 to the combinations of the two target indices, four central tendency measures, and two sampling  
359 strategies.  $IQR_{\text{learning}}$ ,  $IQR_{\text{keeping}}$  and  $IQR_{\text{all subjects}}$  for each ANN were obtained.

360 Because errors in the estimation of the indices (the estimation error is computed as the difference  
361 between the target index and its corresponding estimation obtained from the output of the ANN)  
362 are not normally distributed (and in some cases, some outliers may be present), the difference  
363 between the 97.5 th and 2.5 th percentiles of the estimation error and the median of the absolute  
364 value of the estimation error were also computed for each ANN. Finally, the odds that the absolute  
365 or relative estimation errors were lower than a certain threshold were computed for a certain range

366 of thresholds, and the mean values of the odds were obtained for each case. The obtained odds  
367 curves and mean odds curve values provide a convenient way to compare the impact of the target  
368 index, central tendency measure, and sampling strategy on the performance of different ANN.  
369 The MATLAB<sup>®</sup> code for all these characterizations is also available [in the repository](#).

## 370 Results

371 Fig 5 shows the evolution of the  $IQR_{\text{all subjects}}$  against the hidden neuron layer size for the different  
372 sampling strategies (SS), central tendency measures (CTM), and target index. The ordinate axes  
373 have different scales to observe for each target and SS, which is a reasonable choice for the hidden  
374 neuron layer size. First, the  $IQR_{\text{all subjects}}$  were lower when estimating SDNN from a device using  
375 the SS with a lower smoothing of the data (#1). The worst case occurs when estimating the  
376 RMSSD with a large smoothing of data (SS #2). The results were best when using the arithmetic  
377 mean for smoothing the data (CTM #1) and worst when using the rounded median (CTM #4). Fig  
378 5 also shows that the  $IQR_{\text{all subjects}}$  for a hidden neuron layer size of 10 are comparable to those  
379 obtained for larger sizes; therefore, it is not necessary to use an ANN with a larger number of  
380 neurons. Hence, the remaining results apply to a shallow ANN with 10 neurons in the hidden  
381 neuron layer (in this case, selected from the best performance ANN in 100 fittings for each type  
382 of target, CTM, and SS).

383

384 **Fig 5. Change of  $IQR_{\text{all subjects}}$  with the hidden neuron layer size for the two targets (SDNN**  
385 **for the upper panels and RMSSD for the lower panels) and the two sampling strategies**  
386 **(smoothing window of 10 seconds with an update each second for the left panels and**  
387 **smoothing window of 30 seconds with an update every 5 seconds for the right panels) using**  
388 **the 4 analyzed central tendency measures (CTM).**

389

390



391

392 Table 1 lists the  $IQR_{\text{learning}}$ ,  $IQR_{\text{keeping}}$  and  $IQR_{\text{all subjects}}$  for the different optimized ANN. These  
 393 results mirror those presented in Fig 5 for a hidden neuron-layer size of 10. Fig 6 shows plots of  
 394 the value of the target HRV index against the estimation error (difference between this index and  
 395 the estimated index) to show the agreement of the estimation provided by the ANN. The best and  
 396 worst cases for each index are provided. The difference in levels of agreement (dLoA) estimated  
 397 as the difference between the 97.5% and 2.5% percentiles of the estimation error, as well as the  
 398 median of the absolute value of the estimation error (MAE) for all CTM and SS combinations,  
 399 are shown in Table 2. The results in Fig 6 and Table 2 use the pooled data of the learning and  
 400 keeping sets (19115 different targets).

401 **Fig 6. Some agreement plots for the SDNN and RMSSD indices using the best performance**  
 402 **ANN and the pooled data of the learning and keeping sets.** The upper panels show the  
 403 estimation error for the best case (CTM #1 and SS #1) while the lower panels show the worst case  
 404 (CTM #4 and SS #2).

405 **Table 1. Interquartile range of the estimation errors for each target index, central tendency**  
 406 **measure (CTM) and sampling strategy (SS) assessed using only the learning set ( $IQR_{\text{learning}}$ ),**  
 407 **the keeping set ( $IQR_{\text{keeping}}$ ) or pooling both sets ( $IQR_{\text{all subjects}}$ )**

| Target index: SDNN                     |      |      |      |      |      |      |      |      |
|----------------------------------------|------|------|------|------|------|------|------|------|
| CTM                                    | #1   | #2   | #3   | #4   | #1   | #2   | #3   | #4   |
| SS                                     | #1   | #1   | #1   | #1   | #2   | #2   | #2   | #2   |
| $IQR_{\text{learning}}$<br>(ms)        | 1.77 | 3.29 | 2.68 | 3.56 | 4.94 | 7.77 | 6.72 | 8.23 |
| $IQR_{\text{keeping}}$<br>(ms)         | 1.91 | 3.62 | 2.77 | 4.03 | 5.40 | 8.30 | 7.18 | 9.03 |
| $IQR_{\text{all}}$<br>subjects<br>(ms) | 1.84 | 3.46 | 2.73 | 3.79 | 5.17 | 8.05 | 6.94 | 8.59 |
| Target index: RMSSD                    |      |      |      |      |      |      |      |      |
| CTM                                    | #1   | #2   | #3   | #4   | #1   | #2   | #3   | #4   |
| SS                                     | #1   | #1   | #1   | #1   | #2   | #2   | #2   | #2   |
| $IQR_{\text{learning}}$<br>(ms)        | 3.26 | 6.10 | 5.71 | 6.31 | 9.05 | 9.98 | 9.88 | 10.2 |
| $IQR_{\text{keeping}}$<br>(ms)         | 3.66 | 6.90 | 5.92 | 7.04 | 10.2 | 11.6 | 11.3 | 11.7 |
| $IQR_{\text{all}}$<br>subjects<br>(ms) | 3.47 | 6.48 | 5.82 | 6.65 | 9.60 | 10.8 | 10.6 | 11.0 |

408

409  
410

411 **Table 2. Difference in the levels of agreement (dLoA) and median absolute error (MAE)**

| Target index: SDNN  |      |      |      |      |      |      |      |      |
|---------------------|------|------|------|------|------|------|------|------|
| CTM                 | #1   | #2   | #3   | #4   | #1   | #2   | #3   | #4   |
| SS                  | #1   | #1   | #1   | #1   | #2   | #2   | #2   | #2   |
| dLoA (ms)           | 9.88 | 18.2 | 12.5 | 18.4 | 30.6 | 35.5 | 36.2 | 37.1 |
| MAE (ms)            | 0.93 | 1.73 | 1.36 | 1.92 | 2.66 | 4.00 | 3.55 | 4.28 |
| Target index: RMSSD |      |      |      |      |      |      |      |      |
| CTM                 | #1   | #2   | #3   | #4   | #1   | #2   | #3   | #4   |
| SS                  | #1   | #1   | #1   | #1   | #2   | #2   | #2   | #2   |
| dLoA (ms)           | 15.8 | 31.8 | 25.6 | 33.9 | 66.2 | 68.1 | 72.1 | 69.2 |
| MAE (ms)            | 1.72 | 3.39 | 2.92 | 3.41 | 5.15 | 5.54 | 5.82 | 5.73 |

412 dLoA is estimated as the difference between the 97.5 and 2.5 percentiles of the estimation error  
 413 and median absolute error (MAE) is estimated as the median of the absolute value of the  
 414 estimation error. Results are disclosed for all the combinations of the central tendency measure  
 415 (CTM) and sampling strategies (SS) for the two analyzed targets (SDNN and RMSSD).

416

417 As seen in Fig 6, sometimes the estimation provided by the ANN shows poor agreement with  
 418 the target value even for the best-case scenario (CTM #1 and SS #1). Nevertheless, the agreement  
 419 is better than that suggested by the plots, as shown in Table 2. For CTM #1 and SS #1, when  
 420 estimating SDNN, the estimation error is lower than 9.88 ms in 95% of the cases and lower than  
 421 0.93 ms for half the cases. Using the same CTM and SS, when estimating the RMSDD, the  
 422 estimation error is lower than 15.8 ms for 95% of the cases and lower than 1.72 ms for half of the  
 423 cases. Because of the presence of outliers and, to better characterize the agreement between  
 424 estimates and target indices, the odds of having an absolute value of the estimation error lower  
 425 than a fixed threshold and the odds of having an absolute value of the relative estimation error  
 426 (normalized by the target value of the index) lower than a fixed percentage were computed for  
 427 each evaluated target index, CTM, and SS. For the absolute value of the estimation errors  
 428 thresholds from 0 to 100 ms have been considered in steps of 0.01 ms to obtain the odds curve.  
 429 For the absolute value of the relative estimation error, thresholds from 0% to 100% were  
 430 employed in steps of 0.01%. Odds curves were computed separately for the learning and keeping  
 431 sets. Fig 7 shows the results for the best and worst cases, as shown in Fig 6. Table 3 quantifies  
 432 the odds curves for all combinations of the CTM, SS, and target indices using the arithmetic mean

433 of the odds. An ideal estimation with no estimation error would provide a mean of the odds curve  
 434 equal to one; hence, the lower the mean odds value, the poorer the estimation.

435

436 **Table 3. Mean of the Odds curve**

| Mean of the odds curve for target index SDNN  |      |      |      |      |      |      |      |      |
|-----------------------------------------------|------|------|------|------|------|------|------|------|
|                                               | #1   | #2   | #3   | #4   | #1   | #2   | #3   | #4   |
| CTM                                           |      |      |      |      |      |      |      |      |
| SS                                            | #1   | #1   | #1   | #1   | #2   | #2   | #2   | #2   |
| LA                                            | 0.99 | 0.97 | 0.98 | 0.97 | 0.96 | 0.94 | 0.95 | 0.94 |
| KA                                            | 0.98 | 0.96 | 0.98 | 0.97 | 0.95 | 0.94 | 0.94 | 0.93 |
| LR                                            | 0.97 | 0.94 | 0.95 | 0.94 | 0.91 | 0.88 | 0.88 | 0.87 |
| KR                                            | 0.96 | 0.93 | 0.95 | 0.93 | 0.91 | 0.87 | 0.88 | 0.86 |
| Mean of the odds curve for target index RMSSD |      |      |      |      |      |      |      |      |
|                                               | #1   | #2   | #3   | #4   | #1   | #2   | #3   | #4   |
| CTM                                           |      |      |      |      |      |      |      |      |
| SS                                            | #1   | #1   | #1   | #1   | #2   | #2   | #2   | #2   |
| LA                                            | 0.98 | 0.95 | 0.96 | 0.95 | 0.92 | 0.91 | 0.91 | 0.91 |
| KA                                            | 0.97 | 0.94 | 0.95 | 0.94 | 0.90 | 0.89 | 0.89 | 0.89 |
| LR                                            | 0.91 | 0.83 | 0.85 | 0.82 | 0.73 | 0.71 | 0.70 | 0.70 |
| KR                                            | 0.90 | 0.81 | 0.83 | 0.80 | 0.69 | 0.67 | 0.66 | 0.66 |

437 This table considers thresholds in the estimation of the absolute error between 0 to 100 ms (A) or  
 438 in the relative estimation error between 0 to 100% (R) for the different target indices, central  
 439 tendency measures (CTM) and sampling strategies (SS). Results are reported separately for the  
 440 learning (L) and Keeping (K) sets (i.e. KA is the mean of the odds curve for the absolute  
 441 estimation error for the keeping set)

442

443 **Fig 7. Some Odds curves for the SDNN and RMSSD indices using the best performance**  
 444 **ANN reported for the learning and keeping sets.** The upper panels show the curves for the best

445 case (CTM #1 and sampling strategy #1) when measuring the absolute estimation error while the  
446 lower panels show the worst case (CTM #4 and sampling strategy #2) for the relative estimation  
447 error. For example, when using CTM #4 and SS #2 and estimating SDNN, the odds that the  
448 relative estimation error is lower than 10% is around 50% for both sets. When using CTM #1 and  
449 SS #1 and estimating RMSSD, the odds that the absolute estimation error is lower than 10 ms is  
450 around 95% for the keeping set and 97% for the learning set.

451

452

## 453 **Discussion**

454 The results show that it is feasible to estimate the SDNN or RMSSD using the features of *sHP*  
455 time series and shallow ANN. Moreover, they are reasonable: the estimation of RMSSD is worse  
456 than that of SDNN because it reflects high-frequency components that are filtered by the  
457 smoothing procedure. Furthermore, the larger the smoothing of the data (window length), the  
458 larger are the estimation errors for both indices. Nevertheless, the solutions obtained for the  
459 estimation of the indices were far from optimal. First, a shallow ANN was not the best choice. As  
460 seen in the estimation of RMSSD when using central tendency measure #4 and sampling strategy  
461 #2 in Fig 6, the neural network is more prone to provide positive errors with increasing RMSSD  
462 values, thus providing lower estimates of the index. In these scenarios, a deep-learning ANN can  
463 provide better results. Moreover, while accepting a shallow ANN as a feasible solution, the results  
464 always consider the same set of 16 features, which are basic statistical measurements (the first  
465 four statistical moments) applied to the *sHP*, successive differentiation of this time series, and the  
466 cumulative sum (after mean removal) of the time series. A different set of features can provide  
467 better results, even when using a lower number of features. Further work could be devoted to the  
468 search of sets of features that reduce the estimation errors, especially for cases with higher errors,  
469 such as when using a large smoothing (i.e., SS #2) for the estimation of RMSSD.

470

471

472 Regarding the employed feature set, some of the features could be irrelevant for building the  
473 estimates. To identify irrelevant features, the importance of each feature was tested for each  
474 combination of target, CTM, and SS using the increase in the error of the estimation when each of  
475 the input features suffers a random permutation [21], creating a mismatch between the feature and  
476 its corresponding target. As in the selection of the best neural network, we used the interquartile  
477 range of the estimation error by pooling the learning and keeping sets. The importance of feature  $j$   
478 has been assessed by computing

479

$$480 \quad Imp(j) = \frac{1}{N} \cdot \sum_{i=1}^N \frac{IQR_{perm(i)}}{IQR_{original}} \cdot 100 \quad (7)$$

481 where  $IQR_{perm(i)}$  is the  $IQR_{all\ subjects}$  using the  $i$ -th random permutation of the input feature  $j$  (the  
482 remaining features are kept in the original order) and  $IQR_{original}$  is the  $IQR_{all\ subjects}$  without making  
483 any permutation on the input features.  $N$  is the number of times the feature  $j$  is permuted. Fig 8  
484 shows bar plots of the feature importance for SDNN and RMSSD when using CTM #1 and #2 and  
485 SS #1 and #2 for  $N=100$ . Table 4 shows, for each target, CTM and SS, which are the most important  
486 features, and the list of features that have an importance higher than 300% ( $N = 100$ ). Code for  
487 feature importance is also available [at the repository](#). As shown in Fig 8, for a short smoothing  
488 window (SS #1) and simple smoothing algorithm (CTM #1), some features are prominent with  
489 respect to the others. Nevertheless, as the smoothing window length increases (SS #2) and some  
490 rounding and artifact rejection techniques enter the smoothing algorithm (CTM #4), the differences  
491 in importance among the features severely decrease. Table 4 shows that for SDNN estimation, the  
492 most important feature is, depending on the CTM and SS, the standard deviation of the  $sHP_s$  time  
493 series, or the standard deviation of  $ddsHP_s$ . Other relevant features are the standard deviation of  
494  $dsHP_s$ , standard deviation of  $dddsHP_s$ , and mean value of  $sHP_s$ . For RMSSD estimation, the most  
495 important feature is the standard deviation of  $ddsHP_s$ , or the standard deviation of  $dddsHP_s$ . Another  
496 important feature is the standard deviation of  $dsHP_s$ . It makes sense that, for the estimation of  
497 indices based on the standard deviation of  $RR$  or the standard deviation of the first differentiation

498 of **RR**, the most important features are the standard deviation of differentiated versions of **sHP<sub>s</sub>**.  
 499 Nevertheless, the importance of the features decreased when changing from SS #1 to SS #2. This  
 500 suggests that the algorithm for estimating the indices for SS #2 is more complex because there is no  
 501 small set of features that can be considered important, and any of the features can provide useful  
 502 information to build the estimates. In summary, it seems that the use of the standard deviation of  
 503 differentiated versions of the **sHP<sub>s</sub>** time series probes is useful for the estimation of SDNN and  
 504 RMSSD for short smoothing periods, where errors in the estimation are generally low (as seen in  
 505 Tables 1 to 3). Nevertheless, errors in the estimation increased when SS #2 was employed. In these  
 506 cases, other features can probably improve the estimation of indices.

507 **TABLE 4. Most relevant results for the feature importance analysis using random**  
 508 **permutations.**

| Target Index: SDNN    |                          |                   |                                 |                          |            |     |     |     |
|-----------------------|--------------------------|-------------------|---------------------------------|--------------------------|------------|-----|-----|-----|
| CTM                   | #1                       | #2                | #3                              | #4                       | #1         | #2  | #3  | #4  |
| SS                    | #1                       | #1                | #1                              | #1                       | #2         | #2  | #2  | #2  |
| MIF                   | {4}                      | {2}               | {4}                             | {4}                      | {2}        | {2} | {2} | {2} |
| Max IF (%)            | 4163                     | 840               | 1552                            | 2870                     | 363        | 320 | 351 | 295 |
| Features with IF>300% | {2}<br>{3}<br>{4}<br>{5} | {2}<br>{4}<br>{5} | {1}<br>{2}<br>{3}<br>{4}<br>{5} | {2}<br>{3}<br>{4}<br>{5} | {2}<br>{5} | {2} | {2} | {0} |
| Target Index: RMSSD   |                          |                   |                                 |                          |            |     |     |     |
| CTM                   | #1                       | #2                | #3                              | #4                       | #1         | #2  | #3  | #4  |
| SS                    | #1                       | #1                | #1                              | #1                       | #2         | #2  | #2  | #2  |
| MIF                   | {4}                      | {4}               | {4}                             | {4}                      | {5}        | {5} | {5} | {4} |
| Max IF (%)            | 1219                     | 1236              | 1701                            | 1616                     | 410        | 268 | 276 | 183 |
| Features with IF>300% | {4}<br>{5}               | {3}<br>{4}<br>{5} | {3}<br>{4}<br>{5}               | {3}<br>{4}<br>{5}        | {4}<br>{5} | {0} | {0} | {0} |

509 MIF: Most important feature, Max IF: Importance for the most important feature, IF: Importance  
 510 of each feature. Each feature is coded by an integer number corresponding to the order in Fig 8:  
 511 {1} is the mean of sHPs, {2} is the standard deviation (SD) of sHPs, {11} is the skewness of the  
 512 csHPs time series, {15} is the kurtosis of the dddsHPs time series, etc. {0} is employed when  
 513 none of the features is important enough (IF is lower than 300% for all the features)

514

515 **Fig 8. Feature importance for some selected combinations of target, CTM and SS.** The two  
 516 upper panels provide the feature importance when using CTM #1 and SS #1 for SDNN and

517 RMSSD while the two lower panels provide the feature importance for CTM #4 and SS #2 for  
518 SDNN and RMSSD.

519

520 The main results of this work have dealt with an ANN with a hidden neuron layer size of 10  
521 neurons, which is not a very large number, when using 16 input features. The number of input  
522 features was fixed from the beginning of the ANN design. If a reduced set of features is employed  
523 (i.e., only using the standard deviation of differentiated versions of *sHP<sub>s</sub>*) the size of the hidden  
524 neuron layer can be changed by either enlarging or stretching. A joint optimization of the number  
525 of input features, hidden neuron layer size, and proper selection of features could improve the  
526 estimation of the indices, and will be the purpose of future research.

527 To train the ANN, the Bayesian regularization backpropagation method was used for the sake  
528 of generalizability. As seen in Tables 1 and 3 and in Fig 7, the performance of the ANNs is slightly  
529 worse in the keeping than in the learning sets. Because the differences in *IQR* or in the mean of  
530 the odds curve are small, we can consider that the estimates could generalize well for a completely  
531 new set of input features coming from a new heart rate-measuring device. Nevertheless, to obtain  
532 good estimations, the ANN must be tailored to the underlying device algorithm for heart rate (or  
533 heart period) estimation. In this study, four different smoothers (CTM) and two different  
534 smoothing procedures (SS) were used that can be present in some wearable devices. The  
535 methodology can be applied to other algorithms if manufacturers disclose them.

536 This study employed three different public ECG or beat annotation databases to generate the  
537 targets and features. The Autonomic aging database and the Fantasia database were measured  
538 while the subjects were at rest, while the normal sinus rhythm RR database corresponded to  
539 ambulatory measurements. Although the number of different subjects was overwhelmingly larger  
540 for the first database, the number of analyzed 5-minute segments was larger for the normal sinus  
541 rhythm RR database (14363 segments from a total of 19115 analyzed segments). Hence, we can  
542 consider that most of the features employed for the learning and keeping sets correspond to

543 ambulatory measurements. This affects the performance of the ANNs for each database. Table 5  
 544 shows the median of the estimation error and the median of the relative estimation error for  
 545 different CTM, SS, and target indices for the three databases. The median values among databases  
 546 using the Kruskal-Wallis test showed very significant differences ( $p < 0.001$ ) for all CMT, SS, and  
 547 target indices, except for the relative estimation error of RMSSD while using CTM #4 and SS #1.  
 548 This is a foreseeable result, because most of the information provided to the learning algorithm  
 549 comes from this database. However, worse results correspond to the Autonomic Aging database.  
 550 This could be attributed to the large number of different subjects in the database and the wide age  
 551 range. Hence, the training of the ANNs for future development of SDNN and RMSSD estimators  
 552 should also be performed using a sample of the population with characteristics as close as possible  
 553 to the subjects the algorithm is intended to be applied.

554 **TABLE 5. Median values of estimation errors using the best ANNs disclosed by database,**  
 555 **target index, CTM and SS.**

| Target Index: SDNN  |      |      |      |      |      |      |      |      |
|---------------------|------|------|------|------|------|------|------|------|
| CTM                 | #1   | #2   | #3   | #4   | #1   | #2   | #3   | #4   |
| SS                  | #1   | #1   | #1   | #1   | #2   | #2   | #2   | #2   |
| EA (ms)             | 1.47 | 3.12 | 2.11 | 3.04 | 4.49 | 6.11 | 6.01 | 6.39 |
| EF (ms)             | 0.91 | 2.24 | 1.98 | 2.36 | 3.77 | 5.02 | 6.04 | 6.54 |
| EN (ms)             | 0.84 | 1.51 | 1.20 | 1.74 | 2.31 | 3.58 | 3.07 | 3.82 |
| RA (%)              | 3.07 | 6.87 | 4.36 | 6.39 | 9.65 | 12.8 | 13.3 | 13.8 |
| RF (%)              | 1.88 | 4.57 | 3.51 | 4.74 | 7.89 | 9.45 | 10.9 | 12.2 |
| RN (%)              | 1.99 | 3.60 | 2.76 | 4.05 | 5.57 | 8.47 | 7.12 | 8.93 |
| Target Index: RMSSD |      |      |      |      |      |      |      |      |
| CTM                 | #1   | #2   | #3   | #4   | #1   | #2   | #3   | #4   |
| SS                  | #1   | #1   | #1   | #1   | #2   | #2   | #2   | #2   |
| EA (ms)             | 2.39 | 4.77 | 4.38 | 5.25 | 9.86 | 10.4 | 11.0 | 10.9 |
| EF (ms)             | 1.91 | 4.38 | 4.25 | 4.84 | 8.63 | 8.89 | 11.0 | 10.7 |
| EN (ms)             | 1.60 | 3.10 | 2.60 | 3.00 | 4.37 | 4.76 | 4.88 | 4.79 |
| RA (%)              | 6.37 | 13.6 | 11.2 | 14.9 | 28.9 | 30.4 | 31.9 | 31.9 |
| RF (%)              | 5.67 | 13.3 | 11.4 | 15.6 | 27.8 | 26.6 | 30.4 | 31.7 |
| RN (%)              | 7.58 | 14.8 | 12.4 | 14.7 | 21.9 | 23.3 | 24.4 | 23.6 |



556 EA, EF and EN are the estimation error for the Autonomic aging, Fantasia and Normal sinus  
557 rhythm RR databases respectively. RA, RF and RN refers to the relative estimation error for the  
558 Autonomic aging, Fantasia and Normal sinus rhythm RR databases respectively.

559

560 All RR time series, features, and targets are available [in the repository](#). Hence, the use of other  
561 machine-learning approaches or smoothing algorithms for these data is welcomed.

562

## 563 **Conclusions**

564 This work shows the feasibility of estimating SDNN and RMSSD HRV indices by extracting  
565 features from the heart rate (or heart period) time series once a smoothing algorithm has transformed  
566 the RR or IBI intervals into a smoother version. The extracted features were fed into a properly  
567 fitted ANN to estimate the aforementioned indices. The weights and biases of the ANNs depend on  
568 the index to be estimated and the smoothing algorithm. Because the smoothing algorithm made by  
569 a particular device is generally not disclosed, this study has proposed eight different procedures  
570 based on four different central tendency measures and two different sampling strategies. The results  
571 show that RMSSD is harder to estimate than SDNN, and the estimation error increases with  
572 smoothing of the RR or IBI time series. Moreover, this depends on the database. Further research  
573 on the proposal of new features, their choice, and redesigning of the ANN structure can provide  
574 results with lower estimation errors.

## 575 **References**

576 [1] Singh N, Moneghetti KJ, Christle JW, Hadley D, Plews D, and Froelicher V. Heart rate  
577 variability: An old metric with new meaning in the era of using mhealth technologies for health  
578 and exercise training guidance. Part one: Physiology and methods. *Arrhythmia and*  
579 *Electrophysiology Review*. 2018; 7: 193–198.

- 580 [2] Kleiger RE, Stein PK, and Bigger JT. Heart Rate Variability: Measurement and Clinical  
581 Utility. *Ann Noninvasive Electrocardiol.* 2005; 10: 88–101.
- 582 [3] Task Force of The European Society of Cardiology and The North American Society of  
583 Pacing and Electrophysiology. Heart rate variability Standards of measurement, physiological  
584 interpretation, and clinical use. *European Heart Journal.* 1996; 17: 354–381.
- 585 [4] Berntson GG, Stowell JR. ECG artifacts and heart period variability: Don't miss a beat!.  
586 *Psychophysiology.* 1997; 35: 127–132.
- 587 [5] Lu L, Zhang J, Xie Y, Gao F, Xu S, Wu X, & Ye Z. Wearable health devices in health  
588 care: narrative systematic review. *JMIR mHealth and uHealth.* 2020; 8: e18907. Available from:  
589 <https://mhealth.jmir.org/2020/11/e18907/PDF>
- 590 [6] Georgiou K, Larentzakis AV, Khamis NN, Alsuhaibani GI, Alaska YA, and Giallafos EJ.  
591 Can Wearable Devices Accurately Measure Heart Rate Variability? A Systematic Review. *Folia  
592 medica.* 2018; 60: 7–20.
- 593 [7] Jaafar R, and Xian OC. Analysis of Heart Rate Variability Using Wearable Device. In:  
594 *Computational Science and Technology: 7th ICCST 2020 Proceedings, Pattaya, Thailand, 29–30  
595 August, 2020.* Singapore: Springer; 2021. pp. 453–461.
- 596 [8] Temko A. Accurate Heart Rate Monitoring during Physical Exercises Using PPG. *IEEE  
597 Transactions on Biomedical Engineering.* 2017; 64: 2016–2024.
- 598 [9] Grisan E, Cantisani G, Tarroni G, Yoon SK, and Rossi M. A supervised learning approach  
599 for the robust detection of heart beat in plethysmographic data. In *Proceedings of the Annual  
600 International Conference of the IEEE Engineering in Medicine and Biology Society, EMBS.  
601 IEEE;* 2015. pp. 5825–5828.
- 602 [10] Biswas D, Simoes-Capela N, Hoof C, and Helleputte N. Heart Rate Estimation from  
603 Wrist-Worn Photoplethysmography: A Review. *IEEE Sensors Journal.* 2019; 19: 6560–6570.

- 604 [11] Goldberger AL, Amaral LAN, Glass L, Hausdorff JM, Ivanov PCh, Mark RG, Mietus JE,  
605 Moody GB, Peng CK, and Eugene Stanley HE. PhysioBank, PhysioToolkit, and PhysioNet  
606 Components of a New Research Resource for Complex Physiologic Signals. *Circulation*. 2000;  
607 101: e215–e220.
- 608 Available from: <https://www.ahajournals.org/doi/full/10.1161/01.cir.101.23.e215>
- 609 [12] Schumann A, and Bär KJ. Autonomic Aging – A dataset to quantify changes of  
610 cardiovascular autonomic function during healthy aging. *Scientific Data*. 2022; 9: e95. Available  
611 from: <https://www.nature.com/articles/s41597-022-01202-y>
- 612 [13] Tarvainen MP, Niskanen JP, Lipponen JA, Ranta-aho PO, and Karjalainen PA. Kubios  
613 HRV - Heart rate variability analysis software. *Computer Methods and Programs in Biomedicine*.  
614 2014; 113: 210–220.
- 615 [14] Lipponen JA, and Tarvainen MP. A robust algorithm for heart rate variability time series  
616 artefact correction using novel beat classification. *Journal of Medical Engineering and*  
617 *Technology*. 2019; 43: 173–181.
- 618 [15] Iyengar N, Peng CK, Morin R, Goldberger AL, and Lipsitz LA. Age-related alterations  
619 in the fractal scaling of cardiac interbeat interval dynamics. *American Journal of Physiology-*  
620 *Regulatory, Integrative and Comparative Physiology*. 1996; 271: R1078–R1084.
- 621 [16] The Mathworks Inc., “Matlab.” Natick, Massachusetts, 2021.
- 622 [17] Wang X. Deep learning in object recognition, detection, and segmentation. *Foundations*  
623 *and Trends in Signal Processing*. 2016; 8: 217–382.
- 624 [18] Mackay DJC. Bayesian Interpolation. *Neural Computation*. 1992; 4: 415–447
- 625 [19] Bejani MM, and Ghatee M. A systematic review on overfitting control in shallow and  
626 deep neural networks. *Artificial Intelligence Review*. 2021; 54: 6391–6438.

- 627 [20] Vogl TP, Mangis JK, Rigler AK, Zink WT, and Alkon DL. Accelerating the Convergence  
628 of the Back-Propagation Method. *Biol. Cybern.* 1988; 59: 257–263.
- 629 [21] Breiman L. Random Forests. *Machine Learning.* 2001; 45: 5–32.

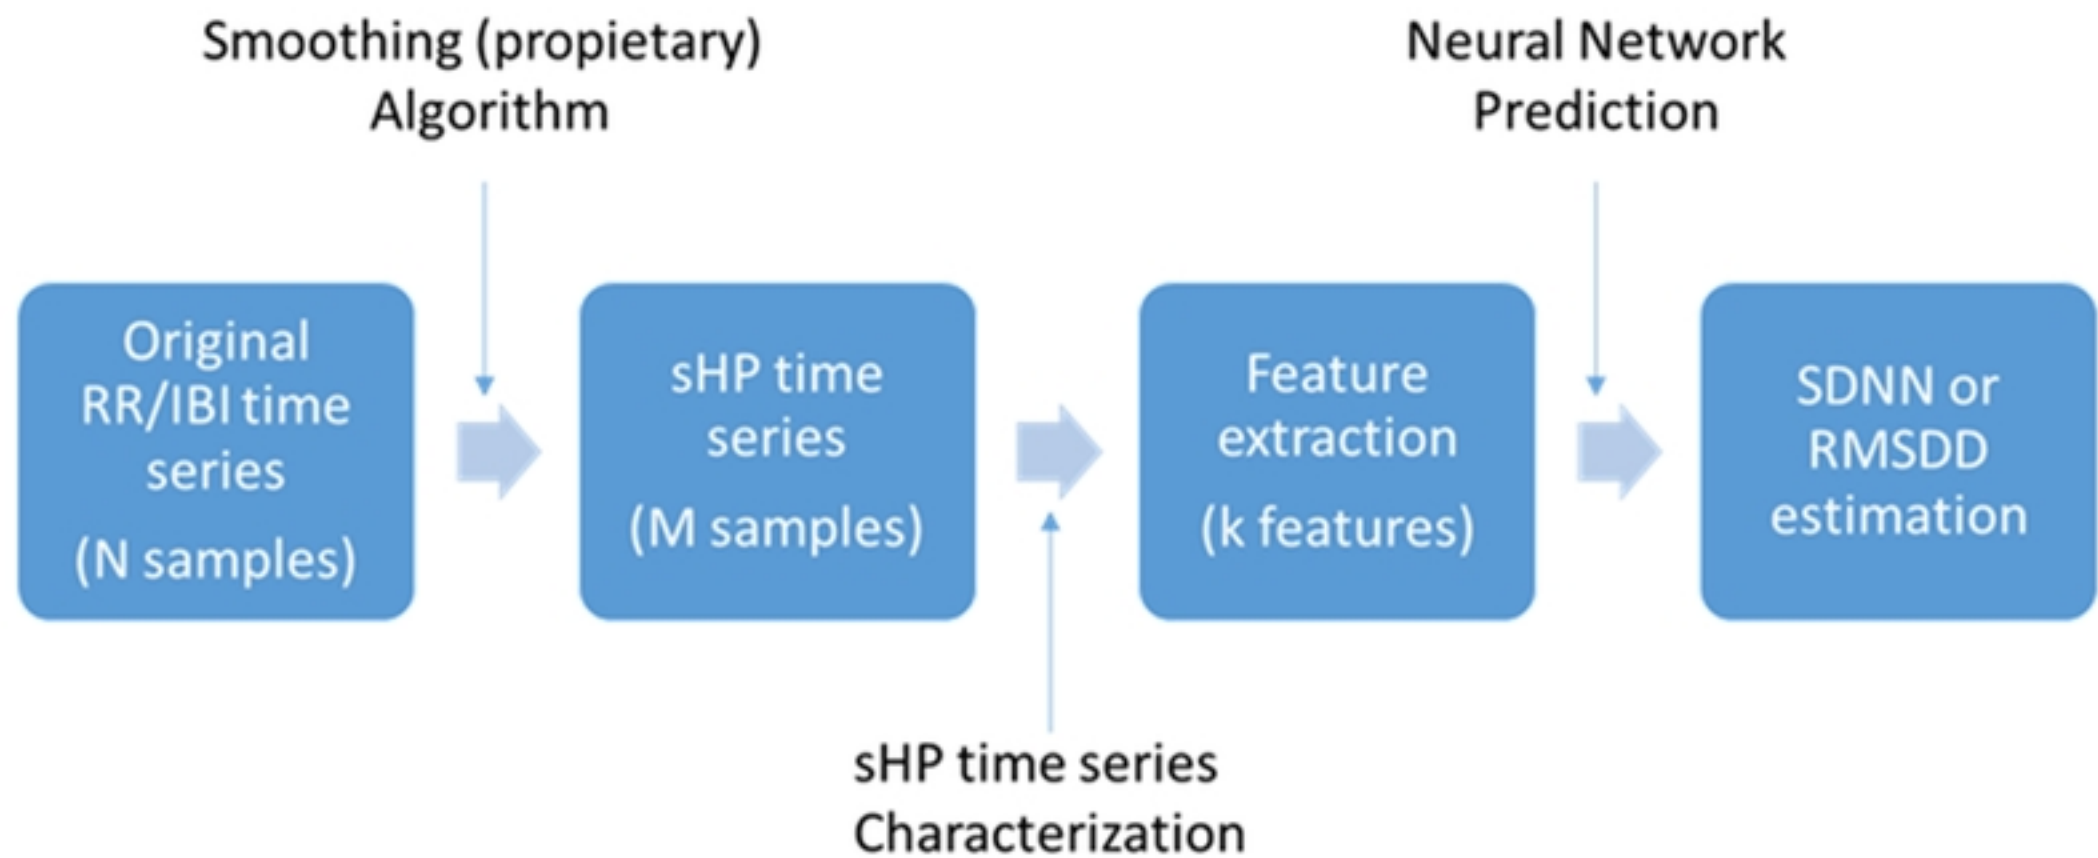

Fig 1

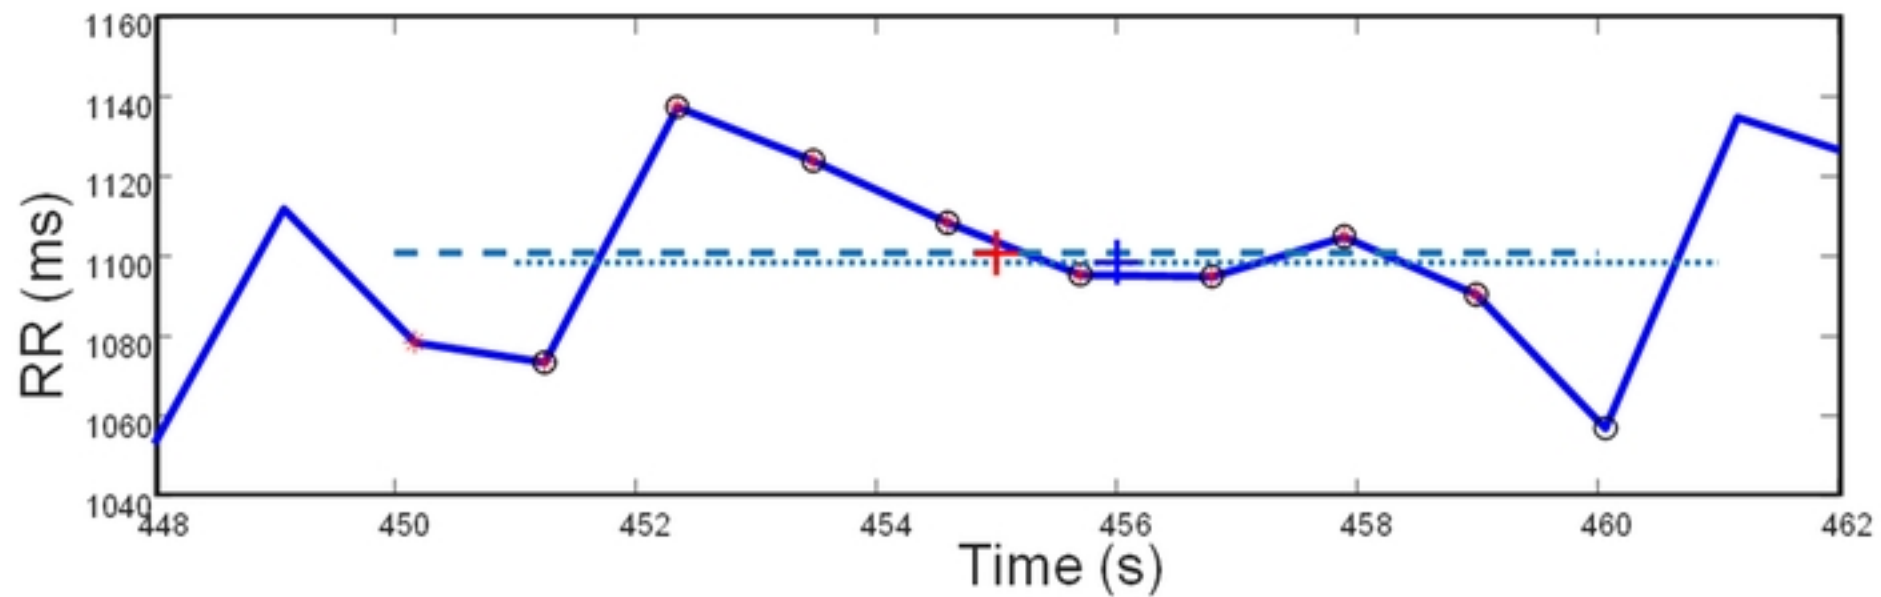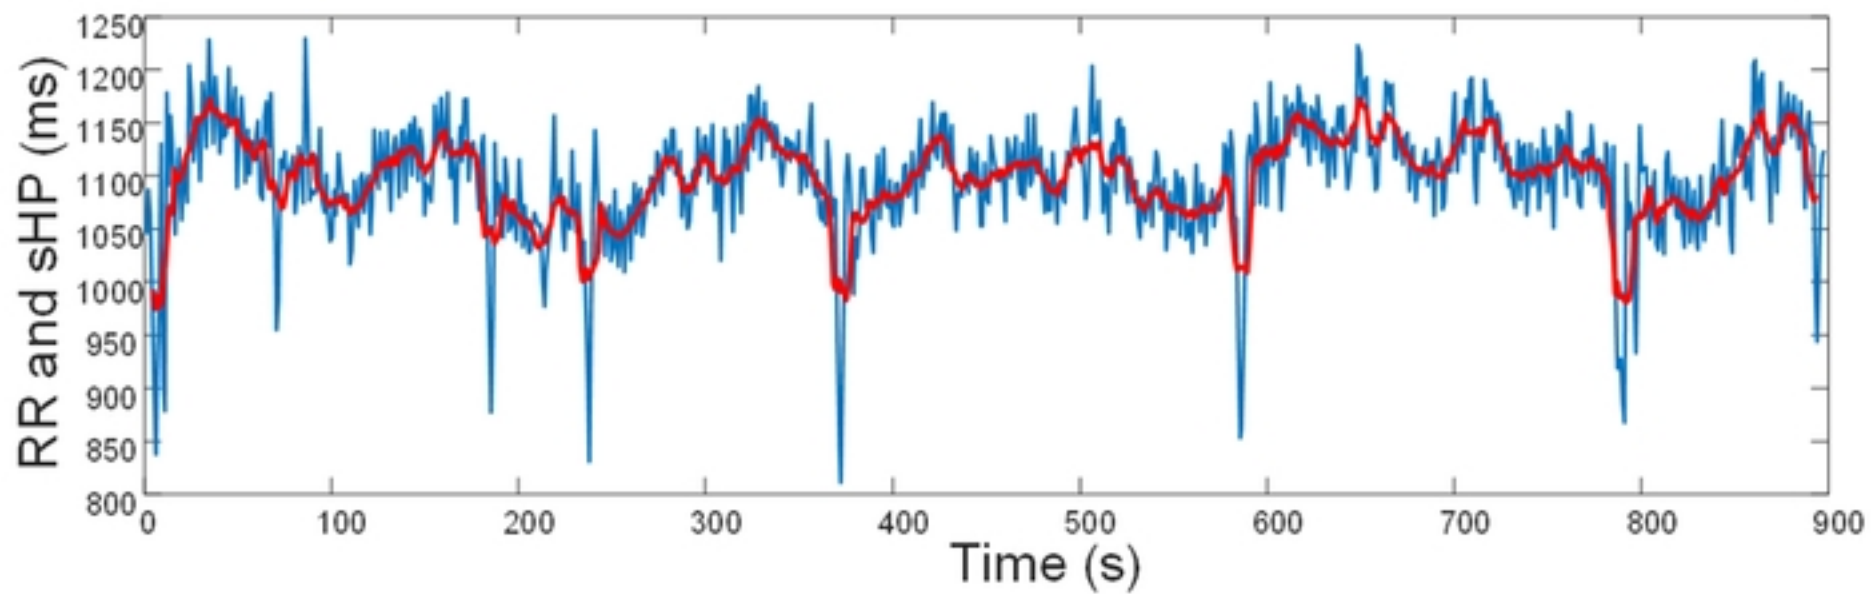

Fig 2

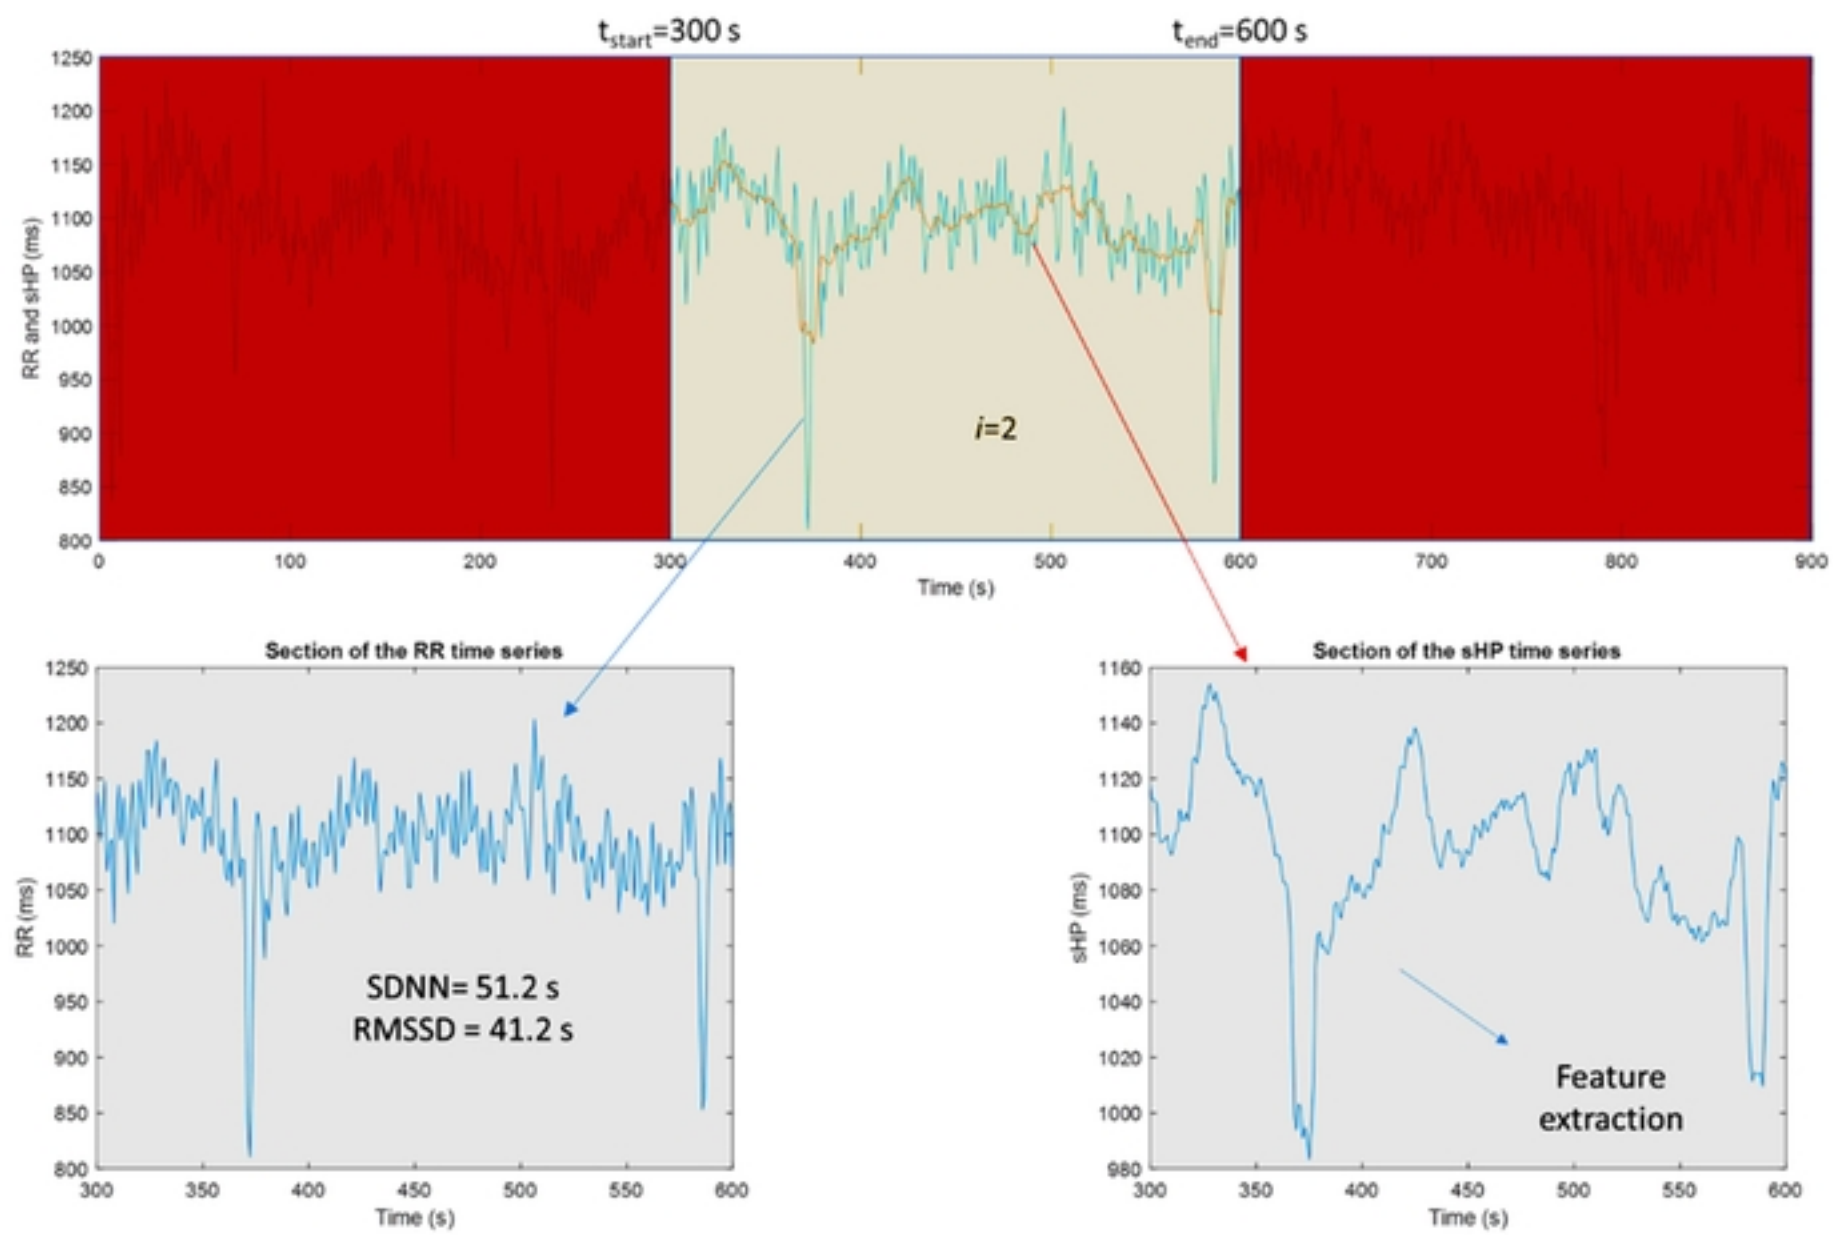

Fig 3

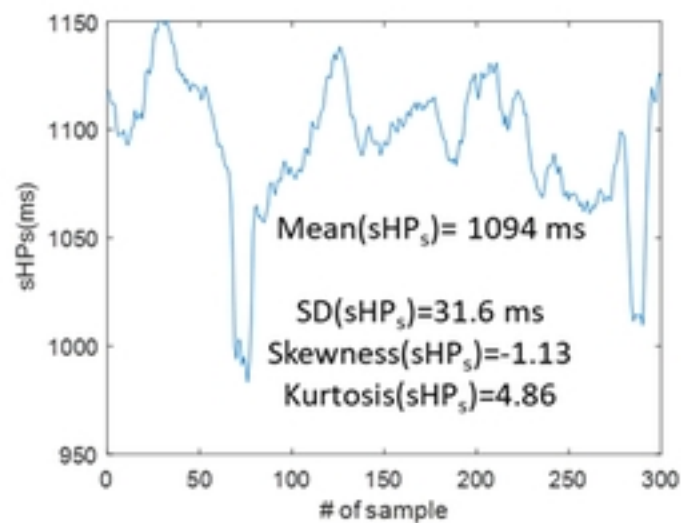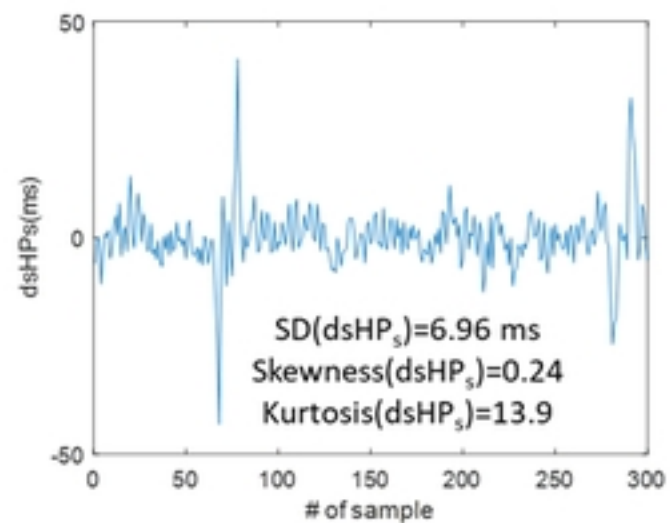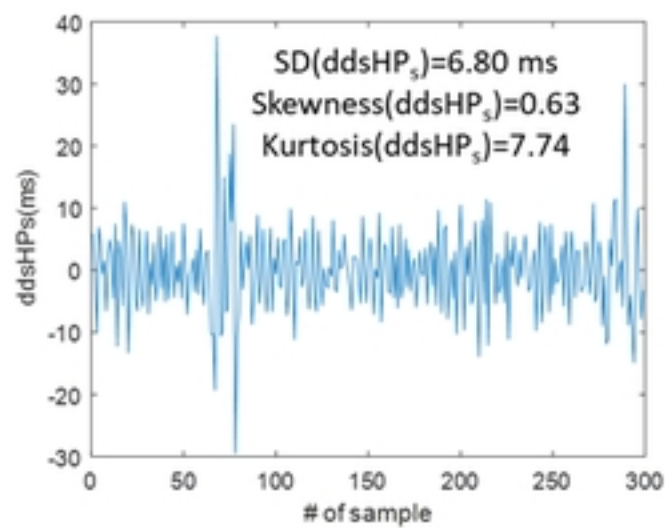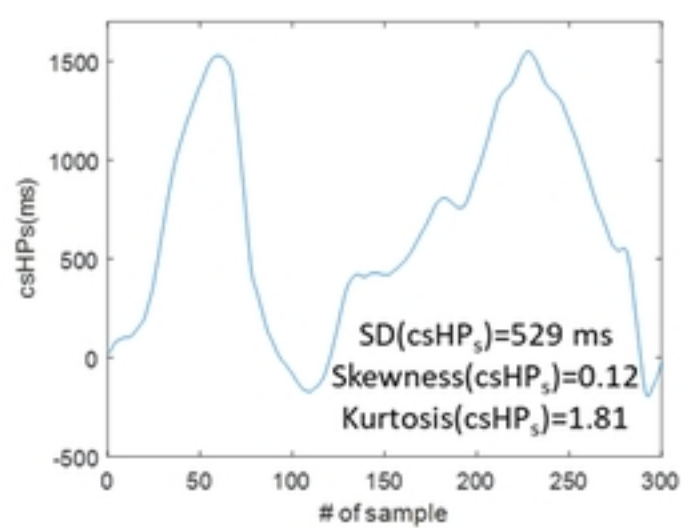

Fig 4



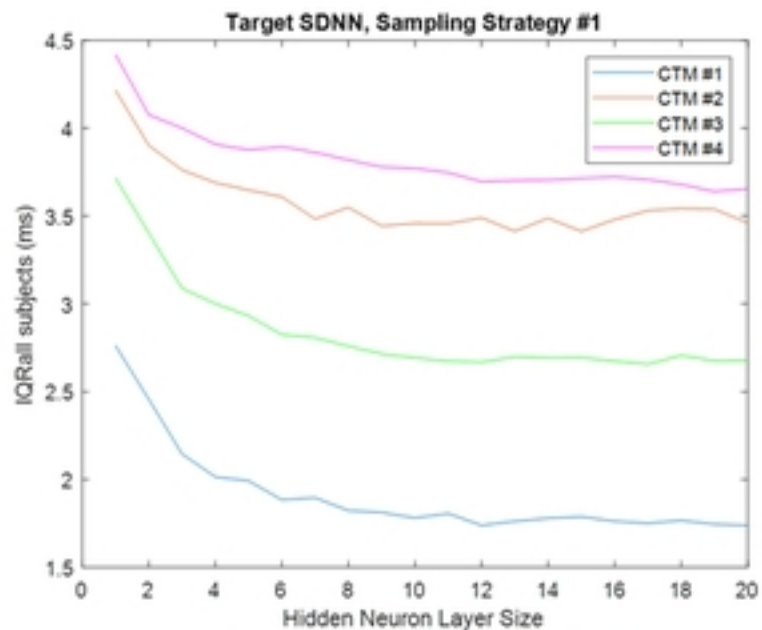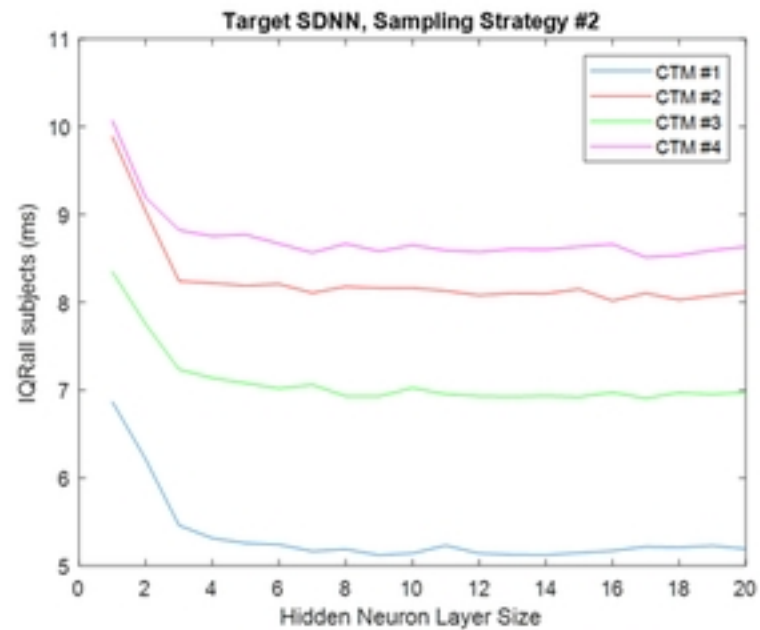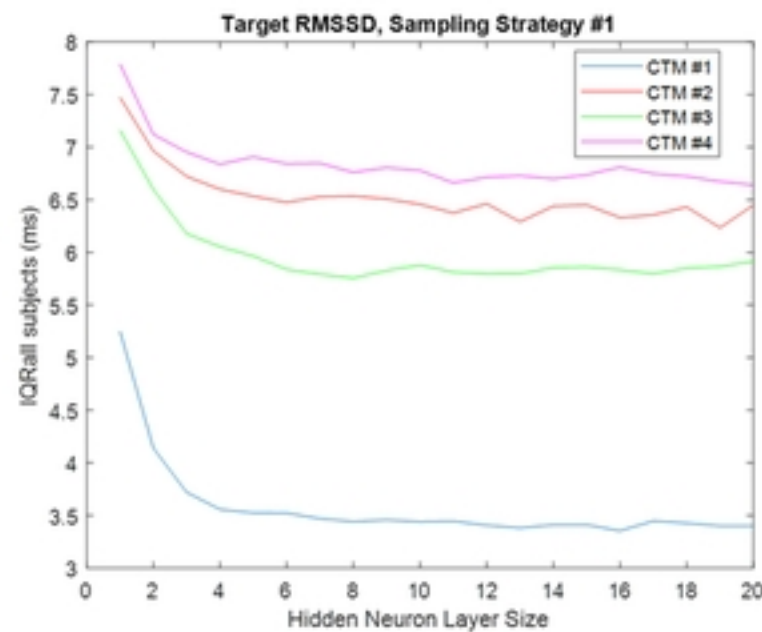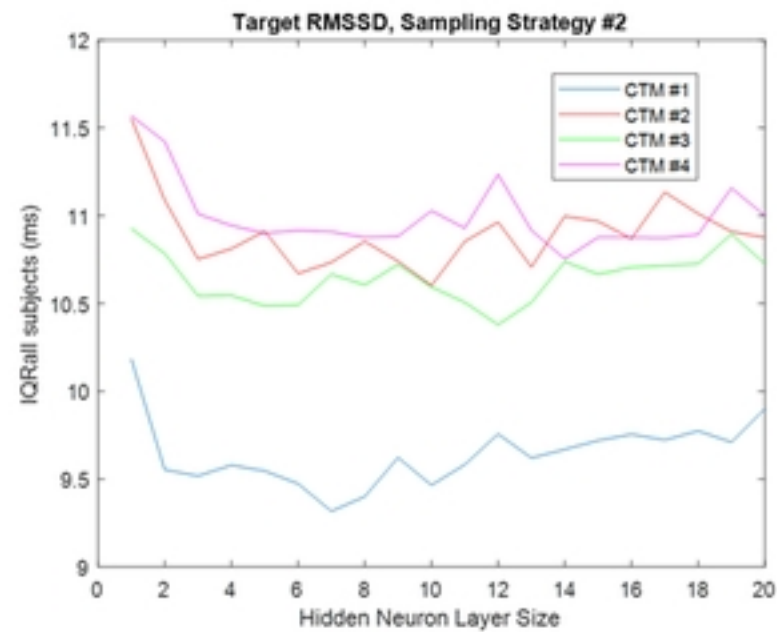

Fig 5

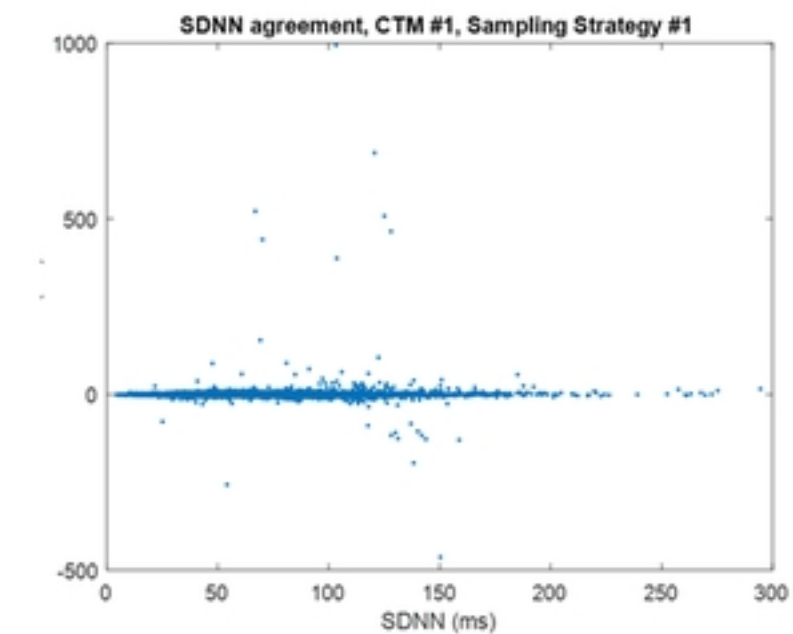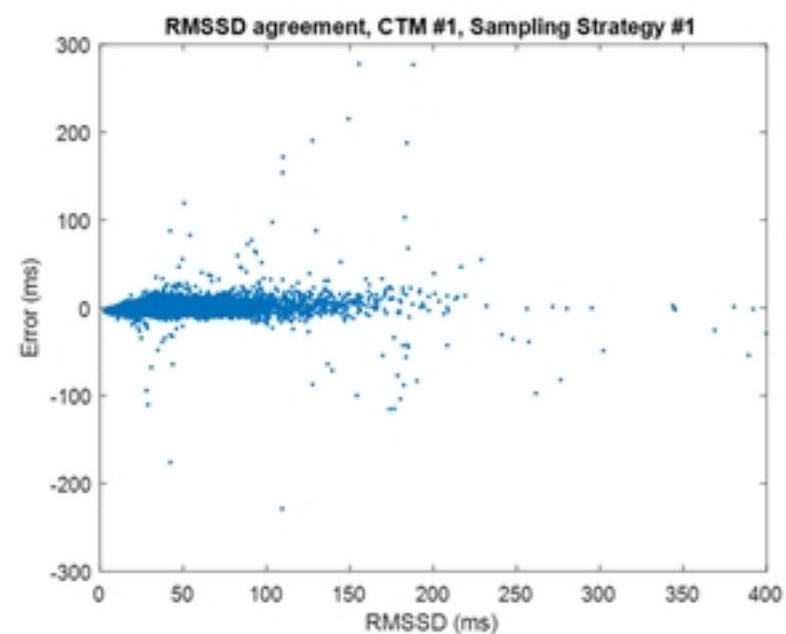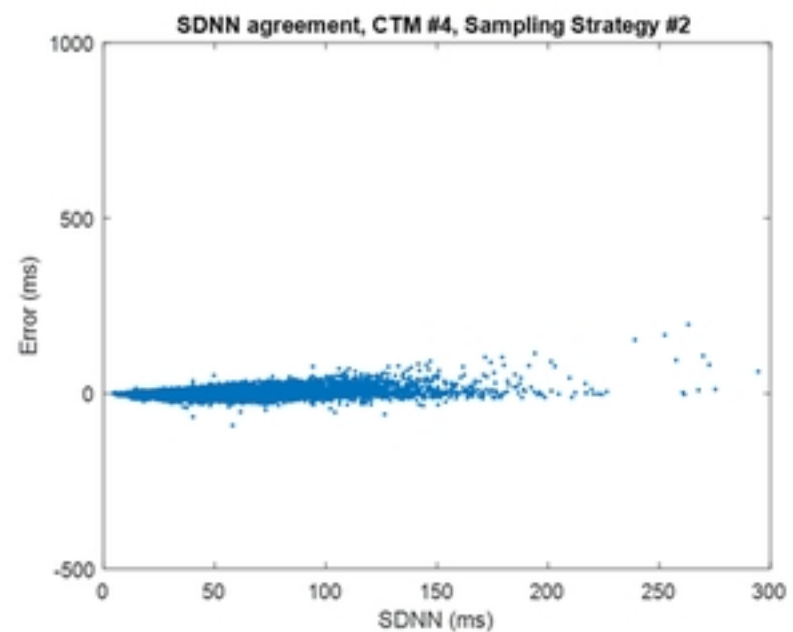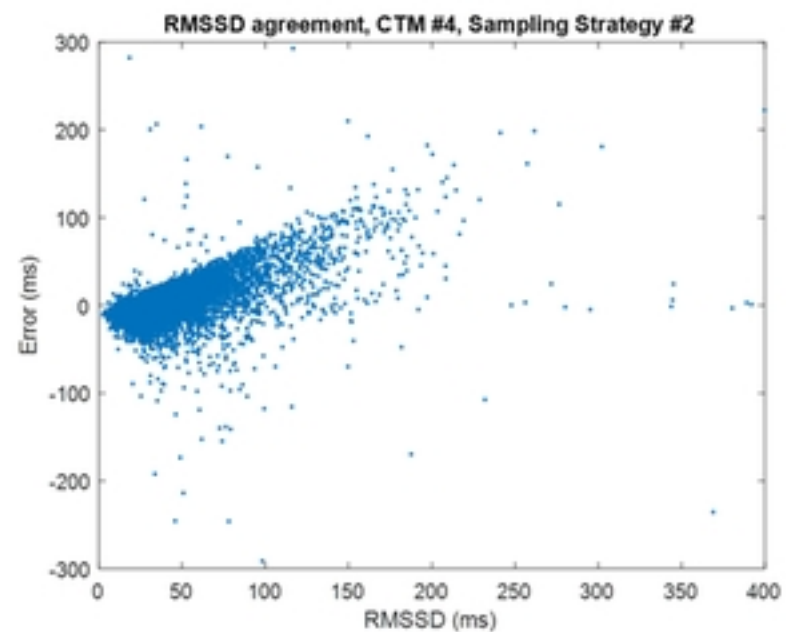

Fig 6

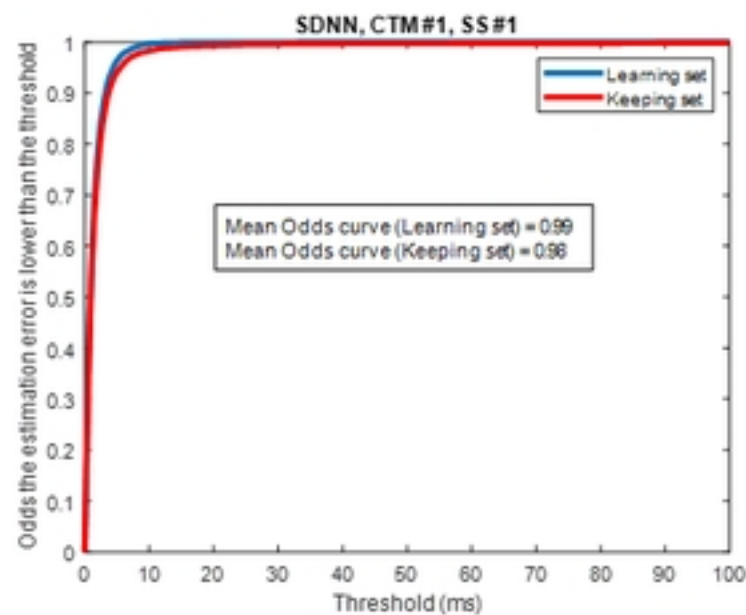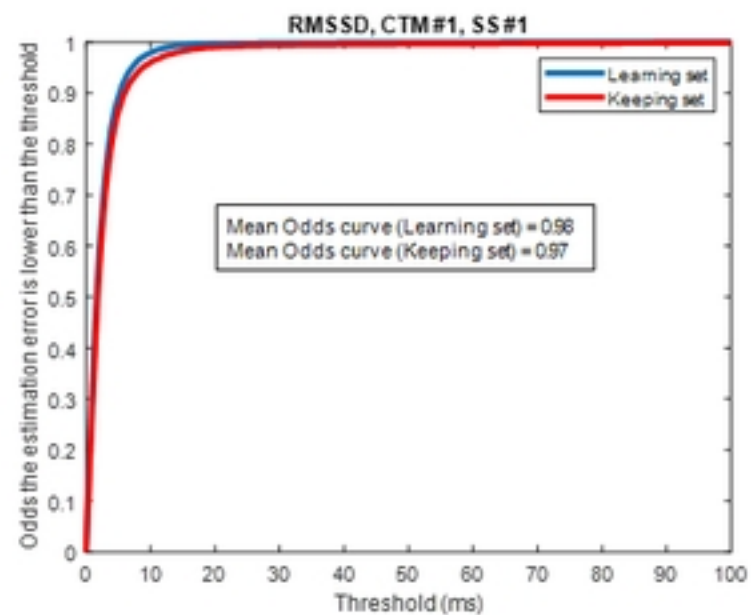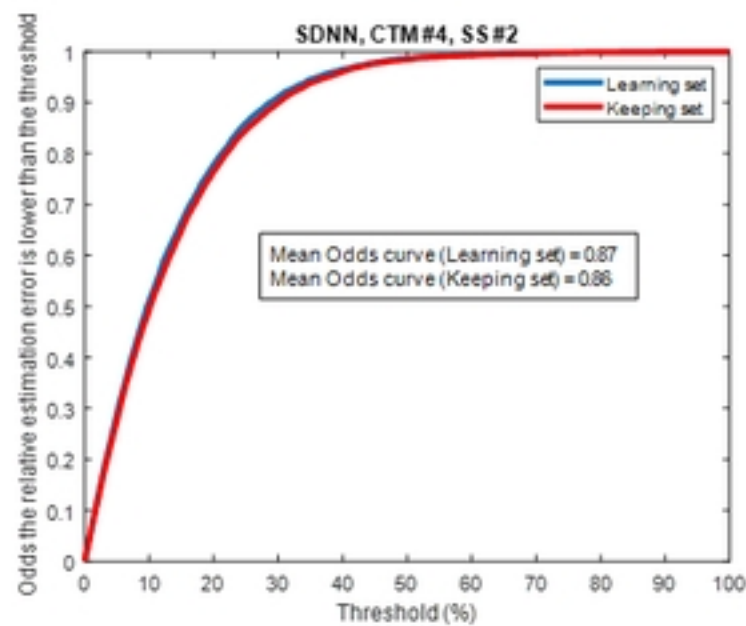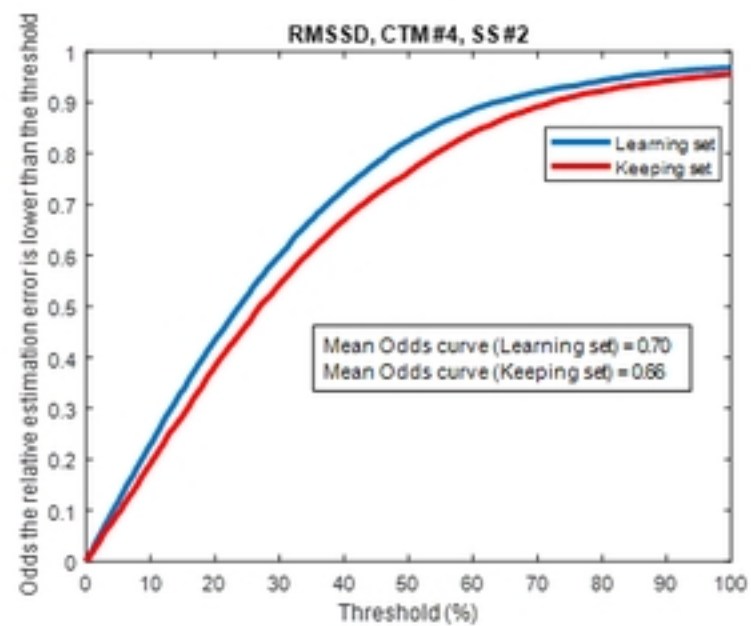

Fig 7

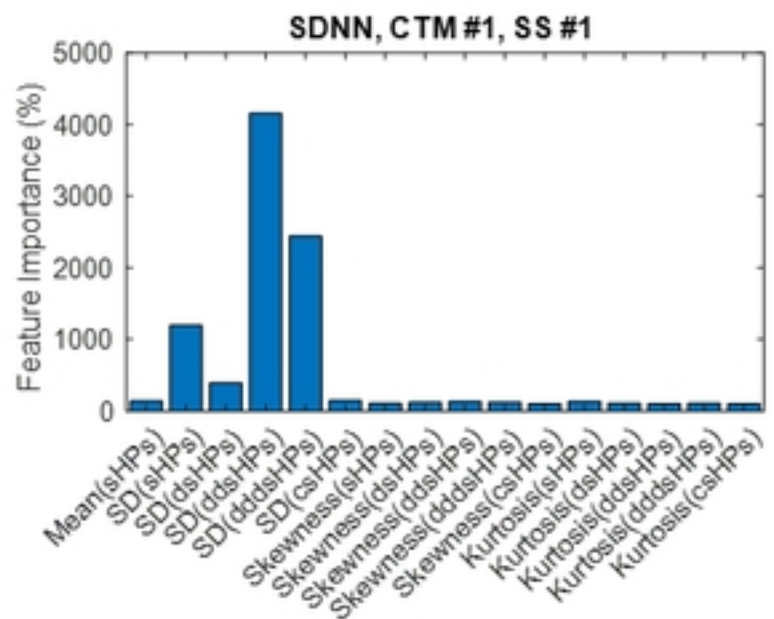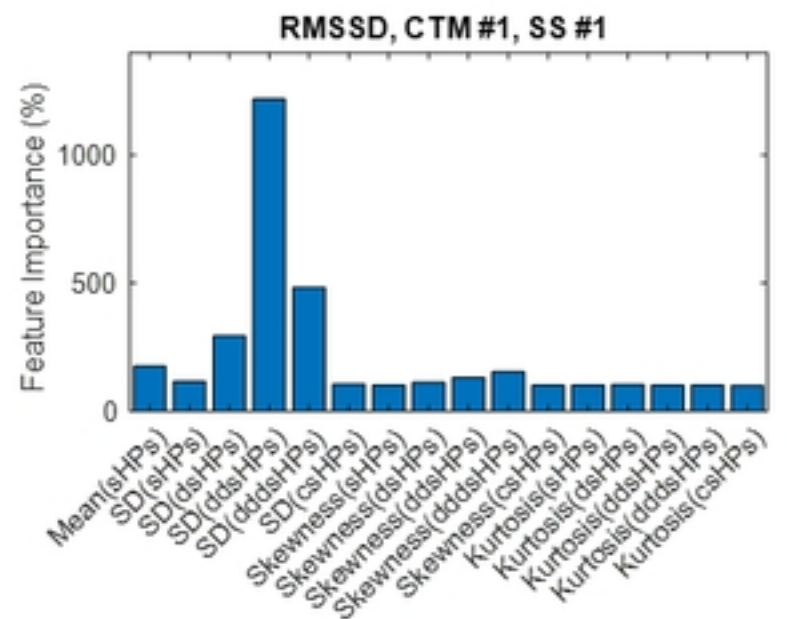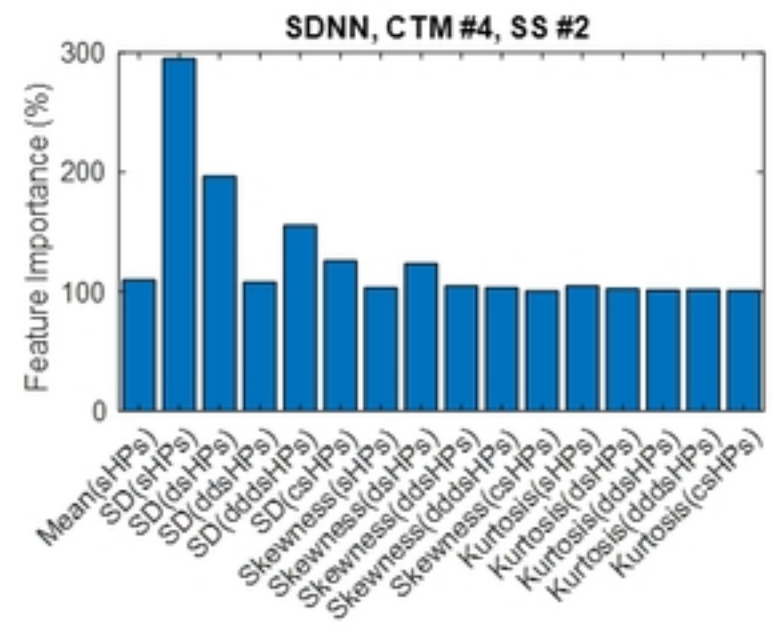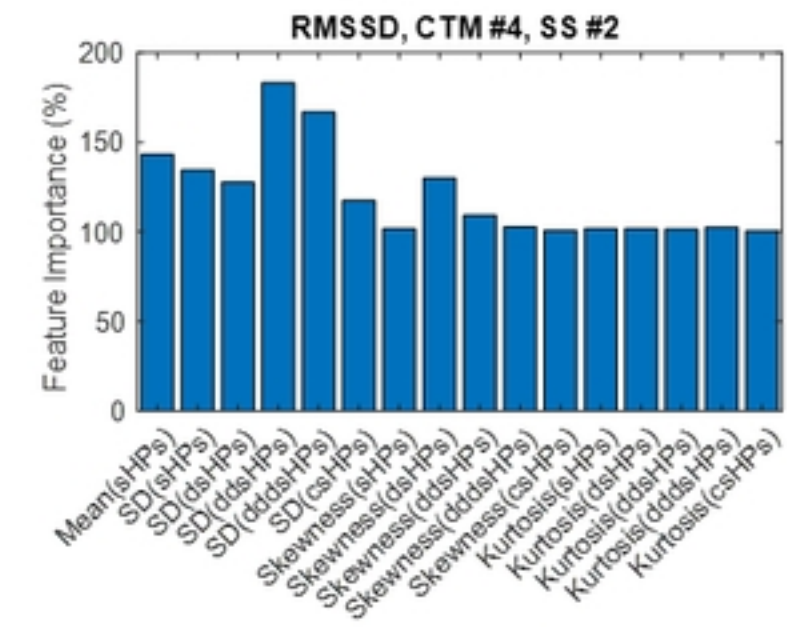

Fig 8
